# Supplementary material for: A new process-based and scale-aware desert dust emission scheme for global climate models – Part I: Description and evaluation against inverse modeling emissions
Source: Copernicus journal article supplement (doi:10.5194/acp-23-6487-2023), 2023-06-14
Supplement: Supplementary file 1 [file acp-23-6487-2023-supplement.pdf]

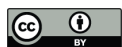

*Supplement of*

**A new process-based and scale-aware desert dust emission scheme for global climate models – Part I: Description and evaluation against inverse modeling emissions**

**Danny M. Leung et al.**

*Correspondence to:* Danny M. Leung ([dannymleung@ucla.edu](mailto:dannymleung@ucla.edu))

The copyright of individual parts of the supplement might differ from the article licence.

30 **Section S1. Converting the volumetric soil moisture to the gravimetric soil moisture.**

31

32 The conversion from volumetric to gravimetric soil moisture is documented in many papers, such  
33 as in Oleson et al. (2013). We followed Kok et al. (2014b) and adopted a globally constant soil  
34 particle density of  $\rho_p = 2650 \text{ kg m}^{-3}$ . Then we used the MERRA-2 global soil porosity (poros,  
35  $\varphi$ , Fig. S1b) to yield the bulk density of soil  $\rho_b$ :

36 
$$\rho_b = \rho_p(1 - \varphi) \tag{S1}$$

37 Then, using the water density of  $\rho_w = 1000 \text{ kg m}^{-3}$ , we converted the MERRA-2 volumetric soil  
38 moisture (SFMC,  $\theta$ ,  $\text{m}^3 \text{ water} / \text{m}^3 \text{ soil}$ , Fig. S1a) to gravimetric moisture  $w$  (kg water / kg soil,  
39 Fig. S1c):

40 
$$w = \frac{\rho_w}{\rho_b} \theta \tag{S2}$$

41

42

43

44

45

46

47

48

49

50 **Section S2. A discussion on other approaches of combining rock and vegetation drag**  
51 **partition effects**

52  
53 To our knowledge only a few approaches explicitly proposed to represent both rock and  
54 vegetation roughness in one drag partition scheme, but they all have different limitations. The first  
55 approach was proposed by Darменова et al. (2009) and subsequently modified by Foroutan et al.  
56 (2017): They assumed rock  $\lambda$  for different land types (e.g., Table 2 in Darменова et al., 2009),  
57 and combined rock  $\lambda$  with vegetation  $\lambda$  (from Eq. 9b) using Darменова’s double drag partition  
58 equation (see Eq. 5 in Foroutan et al., 2017). The second approach was also proposed by  
59 Darменова et al. (2009): They provided measured rock  $z_{0a}$  and vegetation  $z_{0a}$  for different land  
60 types (Table 1 in Darменова et al., 2009), determined the dominant land type (bare or vegetated)  
61 for each grid, and then applied M&B95 to calculate drag partitioning. The third approach was  
62 proposed by Klose et al. (2021): They provided a relation between vegetation  $\lambda$ ,  $h$ , and  $z_{0a}$ , plus  
63 a relation between vegetation height  $h$  and LAI, and thus derived the vegetation roughness length  
64  $z_{0a}$  as a function of LAI. They then used Prigent et al. (2012) satellite measurements of  $z_{0a}$  (time-  
65 invariant, static, mostly representing rocks), and took the larger  $z_{0a}$  between Prigent’s static  $z_{0a}$   
66 and their dynamic vegetation  $z_{0a}$ . They finally used M&B95 to calculate drag partitioning with  
67  $z_{0a}$ . All three approaches tried to represent both rock and vegetation roughness using either  $z_{0a}$  or  
68  $\lambda$ , which was problematic because rocks are better measured in  $z_{0a}$  by satellites and plants are  
69 better parameterized in  $\lambda$ . For example, globally gridded rock  $\lambda$  was not available and thus the first  
70 and second approaches needed to assign  $\lambda$  for rocks as a function of land type, which can be  
71 inaccurate and highly uncertain because  $\lambda$  also depends on other factors apart from the land type.  
72 On the other hand, the second and the third approaches assumed one dominant land type and used  
73 one single (either rock or vegetation)  $z_{0a}$  to represent the whole grid, but ignored the fact that a  
74 grid can be partly covered by plants and partly by rocks, which was only accounted for by the first  
75 approach (the double drag partition equation is a function of rock  $\lambda$ , plant  $\lambda$ , and  $f_v$ ). Note that the  
76 second and the third approaches had to choose either rock or plant  $z_{0a}$  because adding up the rock  
77  $z_{0a}$  and plant  $z_{0a}$  is not allowed ( $z_0$  is not additive, whereas  $\lambda$  is additive). The same problem  
78 would not occur if there were global scale observations of rock roughness measured in density  $\lambda$ ,  
79 which could either be directly applied to the double drag partition equation in Darменова et al.  
80 (2009) or be added upon plant  $\lambda$  and then converted to  $z_{0a}$  in Klose et al. (2021). All in all, due to  
81 insufficient and inadequate observations, all the aforementioned approaches struggle to accurately  
82 represent the combined effect of vegetation and rocks on the drag partition and dust emission. In  
83 Sect. 3.2, we will propose a novel approach that incorporates both roughness of rocks and plants  
84 and equally respects the  $z_{0a}$  and  $\lambda$  from both schools of drag partition parameterizations,  
85 quantifying the drag partitions of rocks and plants into one hybrid drag partition factor  $F_{eff}$ .

86  
87  
88  
89

90 **Section S3. Description of the Comola et al. (2019) intermittency scheme coupled with Kok**  
 91 **et al. (2014b) dust emission equation**

92

93 In the C19 scheme, the dust emission flux  $F_d$  is calculated using the impact threshold ( $u_{*it}$ )  
 94 instead of either the fluid ( $u_{*ft}$ ) or a combined threshold ( $u_{*t}$ ). Following the reasoning in Comola  
 95 et al. (2019b), we update K14 (Eq. 7) with  $u_{*it}$  instead of  $u_{*t}$  as the threshold (see Sect. 2 for the  
 96 description of K14 and dust emission thresholds):

$$97 \quad F_d = C_{tune} C_d f_{bare} f_{clay} \frac{\rho_a (u_{*s}^2 - u_{*it}^2)}{u_{*it}} \left( \frac{u_{*s}}{u_{*it}} \right)^{\frac{C\alpha(u_{*st} - u_{*st0})}{u_{*st0}}} \quad \text{for } u_{*s} > u_{*it} \quad (S3a)$$

98 where  $u_{*st} = u_{*ft} \sqrt{\rho_a / \rho_{a0}}$  is the same standardized fluid threshold as in the default K14 scheme.  
 99 Because  $u_{*it} < u_{*ft}$ , this modified equation accounts for more small dust fluxes that occur due to  
 100 turbulent winds intermittently driving transport even when  $u_* < u_{*ft}$ . These fluxes are important  
 101 over marginal source regions for which emissions are otherwise missed by employing  $u_{*ft}$  as the  
 102 threshold (Comola et al., 2019b).

103 Next, we account for the intermittency effect on dust emissions by following C19 in  
 104 introducing the intermittency factor  $\eta$ , which denotes the fraction of time that saltation is active in  
 105 a model time step (e.g.,  $\sim 30$  mins).  $\eta$  corrects the horizontal sand saltation flux, but since dust  
 106 emission flux scales with saltation flux (Shao et al., 1993),  $\eta$  is also the fraction of time that dust  
 107 emission is active in a model timestep. We thus account for the effect of intermittency by  
 108 multiplying the dust emission flux by  $\eta$  (Comola et al., 2019):

$$109 \quad F_{d,\eta} = \eta F_d \quad (S3b)$$

110 where  $\eta \in [0,1]$ .

111 C19 determines  $\eta$  using the average wind speed, wind fluctuations, and the saltation (and  
 112 thus dust emission) thresholds. C19 parameterizes  $\eta$  using information at the typical saltation  
 113 height of  $z_{sal} = 0.1$  m, so we need to first define  $u_{ft}$ ,  $u_{it}$ , and  $u_s$  to be  $u_{*ft}$ ,  $u_{*it}$ , and  $u_{*s}$  translated  
 114 to the height of  $z_{sal}$  using the log law of the wall:

$$115 \quad u_X(z_{sal}) = \frac{u_{*X}}{k} \ln \left( \frac{z_{sal}}{z_{0a}} \right) \quad (S4a)$$

116 where subscript  $X$  could be  $ft$ ,  $it$  or  $s$ ,  $u(z_{sal})$  is the wind speed at saltation height  $z_{sal}$ ,  $z_{0a}$  is the  
 117 aeolian roughness length taken here as  $10^{-4}$  m for simplicity (see Martin and Kok, 2018), and  $k =$   
 118  $0.386$  is the von Kármán constant in the atmospheric boundary layer (Andreas et al., 2006). To  
 119 parameterize the effect of turbulent wind fluctuations on saltation intermittency, we further define  
 120  $\tilde{u}$  to be the instantaneous wind speed at  $z_{sal}$ , which is described by a normal distribution with a  
 121 mean equal to the model time step mean  $u$  and a standard deviation  $\sigma_{\tilde{u}_s}$  (Chu et al., 1996), and  $u_s$   
 122 and  $\sigma_{\tilde{u}_s}$  are defined for a time interval of  $> 10$  min. Comola et al. (2019b) then showed that the  $\sigma_{\tilde{u}}$   
 123 parameterization using the Monin-Obukhov similarity theory (MOST) worked well for in-situ  
 124 measurements of horizontal saltation fluxes.  $\sigma_{\tilde{u}}$  is height invariant and can be parameterized using  
 125 MOST as (Panofsky et al., 1977):

$$126 \quad \sigma_{\tilde{u}_s} = u_{*s} \left( 12 - 0.5 \frac{z_i}{L} \right)^{1/3} \quad \text{for } 12 - 0.5 \frac{z_i}{L} \geq 0 \quad (S4b)$$

127 where  $L$  is the Monin-Obukhov length and  $z_i$  is the planetary boundary layer (PBL) height. In  
 128 boundary-layer meteorology, turbulence is generated by mechanical shear and buoyancy (Stull,  
 129 1988). The shear-driven turbulence in a flow scales with  $u_{*s}$ , while the buoyancy-driven  
 130 turbulence scales with  $z_i/L$ . According to Eq. (S4b), high-frequency wind fluctuations ( $\sigma_{\tilde{u}_s}$ )  
 131 increase with shear ( $u_{*s} > 0$ ) and buoyancy ( $L < 0$ ). For larger wind fluctuations  $\sigma_{\tilde{u}_s}$ , it is easier

132 for  $\tilde{u}_s$  to sweep across  $u_{it}$  and shut off dust emission, leading to  $\eta < 1$ . As a result, the emission  
 133 flux predicted by our scheme will be smaller than the other existing parameterizations for  $u_s >$   
 134  $u_{ft}$ . If  $u_s \gg u_{ft}$ ,  $\tilde{u}_s$  will be less likely to sweep across  $u_{it}$  and  $\eta$  will approach 1. Furthermore,  
 135 when  $u_{it} < u_s < u_{ft}$ ,  $\eta$  will be much smaller than one and closer to zero, leading to a small  
 136 emission flux when other parameterizations predict a zero emission flux. When  $u_s < u_{it}$ ,  $\eta$  could  
 137 also be greater than zero when  $\sigma_{\tilde{u}_s}$  is large enough so that the instantaneous  $\tilde{u}_s$  crosses through  $u_{it}$ ,  
 138 but the DPM employed would not generate any emission anyway according to Eq. S3a.

139 With saltation-height variables defined, the total fraction of time  $\eta$  when saltation is active  
 140 in a model timestep is then formulated as:

$$141 \quad \eta = 1 - P_{ft} + \alpha(P_{ft} - P_{it}) \quad (\text{S5})$$

142 where  $P_{it} = P(\tilde{u}_s < u_{it})$  is the cumulative probability that the instantaneous wind  $\tilde{u}$  does not  
 143 exceed the impact threshold  $u_{it}$ , and  $P_{ft} = P(\tilde{u}_s < u_{ft})$  is the cumulative probability that  $\tilde{u}_s$  does  
 144 not exceed the fluid threshold  $u_{ft}$ . The fluid threshold crossing fraction  $\alpha$  is defined as the fluid  
 145 threshold crossing rate  $C_{ft}$ , which is the number of times  $\tilde{u}_s$  sweeps across  $u_{ft}$  per second, divided  
 146 by the total crossing rate  $C_{ft} + C_{it}$ , which is the number of times  $\tilde{u}_s$  sweeps across  $u_{ft}$  and  $u_{it}$  per  
 147 second:  $\alpha = \frac{C_{ft}}{C_{ft} + C_{it}}$ .  $\alpha$  approaches 1 when instantaneous wind  $\tilde{u}_s$  mostly crosses  $u_{ft}$ , and  
 148 approaches 0 when  $\tilde{u}$  mostly crosses  $u_{it}$ . C19 showed that  $\alpha$  is a function of  $u_s$ ,  $\sigma_{\tilde{u}}$ ,  $u_{it}$ , and  $u_{ft}$ :

$$149 \quad \alpha \approx \left[ \exp\left(\frac{u_{ft}^2 - u_{it}^2 - 2u_s(u_{ft} - u_{it})}{2\sigma_{\tilde{u}_s}^2}\right) + 1 \right]^{-1} \quad (\text{S6a})$$

150 such that  $\alpha \rightarrow 1$  in the limit of  $u_s \gg u_{ft}$ , and  $\alpha \rightarrow 0$  for  $u_s \rightarrow 0$  and  $\sigma_{\tilde{u}_s} \rightarrow 0$ . As for  $P_{ft}$  and  $P_{it}$ ,  
 151 assuming a Gaussian distribution for  $\tilde{u}$ , i.e.,  $\tilde{u}_s \sim \mathcal{N}(u_s, \sigma_{\tilde{u}_s}^2)$ ,  $P_{ft}$  and  $P_{it}$  can be expressed using  
 152 the error functions  $\text{erf}(x)$  as:

$$153 \quad P_{ft} = \frac{1}{2} \left[ 1 + \text{erf}\left(\frac{u_{ft} - u_s}{\sqrt{2}\sigma_{\tilde{u}_s}}\right) \right] \quad (\text{S6b})$$

$$154 \quad P_{it} = \frac{1}{2} \left[ 1 + \text{erf}\left(\frac{u_{it} - u_s}{\sqrt{2}\sigma_{\tilde{u}_s}}\right) \right] \quad (\text{S6c})$$

155 Within a model timestep, dust emission is continuous for the fraction of time  $1 - P_{ft}$  when  
 156  $\tilde{u}_s > u_{ft}$ , and for the fraction of time  $P_{ft} - P_{it}$  dust emission is in the hysteresis regime ( $u_{it} <$   
 157  $\tilde{u}_s < u_{ft}$ ) where dust emission can only be active for a fraction of time  $\alpha$  when  $\tilde{u}_s$  crossed  $u_{ft}$   
 158 more recently than  $u_{it}$  in the hysteresis regime. Using Eqs. S3–S6, we computed  $\eta$  from Eq. S3b,  
 159 yielding the dust emission flux  $F_{d,\eta}$  that accounts for the effects of intermittency.

160 We note that the C19 scheme is designed for GCMs and RCMs in RANS mode (not in LES  
 161 mode), regardless of the time step used.

162  
 163

164 **Section S4. Calculating the Obukhov length  $L$  from MERRA-2 meteorological fields**

165

166 MERRA-2 does not include the Obukhov length  $L$ , but outputs several variables that allows us to  
167 compute  $L$ , using (Bonan, 2015; Lee and Buban, 2020):

168 
$$L = -\rho_a c_p T u_*^3 / k g H, \tag{S7}$$

169 where  $\rho_a$  is air density ( $\text{kg m}^{-3}$ ),  $c_p$  is the specific heat capacity of air under constant pressure ( $\text{J}$   
170  $\text{kg}^{-1} \text{K}^{-1}$ ),  $T$  is air temperature (in this study we chose  $T_{10}$ , which is air temperature at the height of  
171 10 m),  $u_*$  is friction velocity ( $\text{m s}^{-1}$ ),  $k$  is the von Kármán constant,  $g$  is gravitational acceleration  
172 ( $\text{m s}^{-2}$ ), and  $H$  is the sensible heat flux ( $\text{W m}^{-2}$ ). MERRA-2 provides sensible heat flux (SHLAND)  
173 and  $T_{10}$  (T10M), allowing us to directly compute  $L$ .

174

175

176

177 **Section S5. Comparing our simulated dust emission threshold against observationally**  
178 **derived Pu et al. (2020) threshold**

179

180 Here we make a comparison between our simulations of dust emission thresholds and the  
181 observationally based threshold estimate from Pu et al. (2020). They compared the wind speed  
182 distributions from reanalyses against observationally derived DAOD distributions to obtain a  
183 threshold wind speed  $u_{t,Pu}$  for each gridbox (Fig. S13 below) that corresponds to a threshold  
184 DAOD value (i.e., 0.5 over arid regions and 0.05 over semiarid regions), above which is defined  
185 as a dust emission event.

186 In this paper, we argue that dust emission equations should employ the impact threshold  
187  $u_{*it}$ . Given that  $u_{t,Pu}$  was obtained by matching DAOD distributions against the distributions of  
188 wind speed  $u$ ,  $u_{t,Pu}$  is more relevant to the impact threshold  $u_{it}$  than the fluid threshold  $u_{ft}$  (i.e.,  
189 the moisture effect is less relevant). Furthermore, Pu et al. (2020) used wind speed  $u$  at 10 m  
190 instead of the soil surface wind speed  $u_s (= uF_{eff})$  in the analysis, and thus  $u_{t,Pu}$  captured a larger  
191 threshold wind speed that included the impact threshold  $u_{it}$  as well as the drag partition effect  $F_{eff}$   
192 that inhibits saltation. To make a fair comparison, we compare here  $u_{t,Pu}$  against our  $u_{*it}$  divided  
193 by the drag partition factor,  $u_{*it}/F_{eff}$ , which is larger than  $u_{*it}$ . We used the log law of the wall  
194 (Eq. S4a) to change  $u_{*it}$  from a velocity scale to a velocity of  $u_{it}$  at the level of  $z = 10$  m, yielding  
195  $u_{it}/F_{eff}$  instead.

196 In Fig. S13, the top two panels show the Pu et al. (2020) annual mean threshold  $u_{t,Pu}$  (Fig.  
197 S13a) and the  $u_{it}/F_{eff}$  from our scheme (Fig. S13b). Both maps share similar spatial variability  
198 and magnitudes over certain regions such as Africa and Australia. The bottom panels show the  
199 bias (Fig. S13c) and ratio (Fig. S13d) of the thresholds, showing that the larger discrepancies occur  
200 over East and Central Asia. For instance, over the Kyzylkum,  $u_{t,Pu}$  is 4–7 m s<sup>-1</sup> higher than our  
201 threshold. In general, Fig. S13c shows that, over most emission source regions,  $u_{t,Pu}$  and our  
202 threshold are relatively close to each other and differ by ~1–2 m s<sup>-1</sup>. This comparison shows that  
203 both methods derived dust emission thresholds of similar magnitudes and moderate spatial  
204 consistency.

205 We note two small caveats to this comparison. First,  $u_{t,Pu}$  was derived by using a DAOD  
206 threshold as a proxy for defining an emission event, such that the inferred threshold depends on  
207 the extent to which non-local dust is advected from upwind regions instead of emitted locally. This  
208 transport effect might cause a lower  $u_{t,Pu}$  in downwind regions, such as over the Sahel, as seen in  
209 Fig. S13a. Therefore, the global spatial pattern of  $u_{t,Pu}$  partially reflects the DAOD spatial  
210 variability. Second, our  $u_{it}/F_{eff}$  (Fig.13b) is an annual mean, including those high-LAI seasons  
211 when there are no dust emissions. Therefore, removing seasons with high LAI and low emissions  
212 would likely yield a smaller mean  $u_{it}/F_{eff}$  over semiarid regions, which might better represent  
213 the annual threshold wind speed (beyond which dust emission occurs).

214

215

216

217

218

219 **Section S6. A detailed discussion of the caveats and limitations of the new dust emission**  
220 **scheme**

221

222 **6.1. Soil median diameter representation**

223 For our derived parameterization for the dry soil median diameter  $\bar{D}_p$ , we obtained a  
224 relationship between  $\bar{D}_p$  and silt+clay fraction for non-arid regions ( $LAI > 1$ ), and a constant of  
225  $\bar{D}_{p0} = 127 \pm 47 \mu\text{m}$  for arid regions ( $LAI < 1$ ). In theory,  $\bar{D}_p$  should be a function of soil properties  
226 (Hillel, 1980) and therefore implicitly of space and time, but we obtained a simple relationship for  
227  $\bar{D}_p$  over arid regions because 1) different studies provided measurements of different soil  
228 properties such that data are limited and insufficient for a more detailed statistical analysis, 2) the  
229 uncertainties of the measured soil PSDs are moderately large, and 3) most  $\bar{D}_p$  measurements over  
230 arid regions found  $\bar{D}_p$  within 40–250  $\mu\text{m}$  (Fig. 1c), which limited the dry fluid threshold  $u_{*ft0}$  to  
231 vary within the relatively small range of  $\sim 0.204\text{--}0.268 \text{ m s}^{-1}$  (from Eq. 2 assuming  $\rho_a =$   
232  $1.225 \text{ kg m}^{-3}$ ). This range is about ten times smaller than the global range of the wet fluid  
233 threshold  $u_{*ft}$  ( $\sim 1 \text{ m s}^{-1}$ ). Thus, using a single  $\bar{D}_{p0} \sim 127 \mu\text{m}$  across all arid regions appears to be  
234 a reasonable approach given the current data availability.

235 A number of previous studies have also compiled their global  $\bar{D}_p$  maps for calculating the  
236 dust emission threshold (Laurent et al., 2008; Tegen et al., 2002; Menut et al., 2013). These studies  
237 used global soil texture data (with known fractions  $f_a$  of soil components including sand, silt, and  
238 clay) to determine gridded soil types using the soil texture triangle diagram (e.g.,  
239 FAO/IIASA/ISRIC/ISS-CAS/JRC, 2012; Chatenet et al., 1996; Shirazi and Boersma, 1984), and  
240 calculated gridded  $\bar{D}_p$  maps by combining the soil component fractions  $f_a$  with the estimated  
241 aggregated particle size  $\bar{D}_a$  of the soil components by a weighted mean  $\bar{D}_p = \sum_a f_a \bar{D}_a$  (Menut et  
242 al., 2013). Since these  $\bar{D}_a$  values are based on measurements from Chatenet et al. (1996), these  
243 studies also took into account the aggregated sizes of the individual soil components. However,  
244 owing to insufficient data worldwide, these maps have not been verified against the measurements  
245 of the in-situ soil PSD. On the other hand, our results based on observations suggest that the spatial  
246 variability of  $\bar{D}_p$  over deserts are relatively small compared to  $\bar{D}_p$  over nonarid regions, and does  
247 not significantly correlate with soil texture and soil properties (see Eq. 14). Our results thus  
248 surprisingly suggest that the  $\bar{D}_p$  parameterization can reasonably be much simplified into a global  
249 constant over arid regions. This approach is consistent with another current approach of employing  
250 a globally constant soil particle diameter (e.g., Zender et al., 2003a; Mahowald et al., 2006) and  
251 significantly different from another approach of employing a  $\bar{D}_p$  map (e.g., see Fig. S10 for the  
252 input  $\bar{D}_p$  map for the CHIMERE CTM; Mailler et al., 2017; Menut, 2018; Menut et al., 2021).  
253 Furthermore, the  $\bar{D}_p$  measurements showed a positive relationship with the silt+clay fraction  
254  $f_{\text{silt+clay}}$  over the non-arid regions, which we attributed to the increasing cohesion between soil  
255 particles with the increasing silt+clay content. This is different from the negative  $\bar{D}_p - f_{\text{silt+clay}}$   
256 relationship assumed by most past studies (Tegen et al., 2002; Laurent et al., 2008; Menut et al.,  
257 2013) as they assumed that  $\bar{D}_p$  increased with sand content ( $f_{\text{sand}} = 1 - f_{\text{silt+clay}}$ ). We argue that  
258 our  $\bar{D}_p - f_{\text{silt+clay}}$  relationships are based on observations and should thus represent an  
259 improvement over the past assumed  $\bar{D}_p$ -texture relationships. We anticipate that as more  
260 measurements emerge in the future, more statistical or machine learning modeling approaches can



261 more robustly decipher the intricate relationships between the aggregated  $\bar{D}_p$  and the soil  
262 properties in order to further improve the representation of the global  $\bar{D}_p$  map.

263  
264

## 265 **6.2. Hybrid drag partition scheme**

266 For our drag partition scheme, we combined the drag partition for rocks ( $f_{eff,r}$ ) from the  
267 Marticorena and Bergametti (1995) scheme with the drag partition for vegetation ( $f_{eff,v}$ ) from the  
268 Okin (2008) scheme using a weighted mean approach employing the land cover fractions of rocks  
269 and vegetation, which is a novel approach. Nonetheless, our scheme still contains several major  
270 limitations. First and foremost, we calculate the rock  $f_{eff,r}$  using the Prigent et al. (2005) aeolian  
271 roughness length data derived from the ERS microwave sensor, but we could not completely  
272 separate rock roughness from vegetation roughness in the dataset. Marticorena et al. (2006) argued  
273 that ERS sensor measurements has relative small local incident angles such that the contribution  
274 from vegetation roughness is relatively small compared to the contribution from rock roughness.  
275 We also removed as much vegetation influence as possible on  $z_{0a}$  by taking the minimum  $z_{0a}$  out  
276 of the 12 available monthly data for all grids, but it is still possible that a small fraction of  
277 vegetation roughness remains. Thus, our approach of combining the time-invariant Pr05  $z_{0a}$  (and  
278  $f_{eff,r}$ ) with the time-varying  $f_{eff,v}$  will probably result in a small degree of double-counting of  
279 vegetation roughness in our drag partition scheme. We also note that the Pr05 data used the  
280 microwave backscatter coefficient as a proxy for inferring  $z_{0a}$ , but it does not perfectly correlate  
281 with the  $z_{0a}$  measured by the ground sites, and so there will be some corresponding errors in the  
282 Pr05  $z_{0a}$  used in our drag partition scheme.

283 Second, the land cover fraction areas used are obtained from the ESA CCI dataset in our  
284 drag partition scheme, which are annual mean and thus not season-dependent. The land cover of  
285 vegetation  $A_v$  in Eq. 21b should also be a function of time mainly because of the seasonally  
286 changing vegetation cover. However, most current land cover datasets provide annual data but not  
287 seasonal data, and thus  $A_r$  and  $A_v$  in Eq. 21b are only spatially varying within the year 2006.  
288 Furthermore, most land cover datasets only provide near-term land cover data (the farthest data  
289 goes back to the year 850; e.g., Klein Goldewijk et al., 2017). ESA CCI has a temporal coverage  
290 of 1992–2019, and so the dataset will represent relatively well for present-day scenarios but  
291 become less representative of paleoclimatological scenarios, for which the vegetation distributions  
292 differ from that in the present day, such as during the Green Sahara > 6000 years ago (Kutzbach  
293 et al., 1996; Bonan, 2015).

294 A third limitation of our new drag partition scheme is that the Okin (2008) drag partition  
295 scheme requires the vegetation cover fraction  $f_v$  as a proxy for vegetation density. In this study,  
296 we proposed  $LAI \sim f_v = 1 - f_{bare}$  as discussed in Eq. 18b. Since LSMs do not have accurate  
297 simulations of  $f_v$ , there are only preliminary equations for calculating the bare and vegetated  
298 fractions proposed by previous papers (e.g., Mahowald et al., 2006; see discussions in Eq. 11 and  
299 Eq. 18b). However, Eq. 11 (and thus  $f_v \sim LAI$ ) only applies to regions with low LAI because  
300 leaves are mostly not overlapped; over regions with higher LAI, leaves start to overlap and  $LAI >$   
301  $f_v$ . Thus, this assumption could overestimate  $f_v$  and thus  $f_{eff,v}$ , thereby underestimating dust  
302 emissions over vegetated regions (e.g., underestimations over western U.S. deserts in Fig. 7e).  
303 Thus, LSMs need a more accurate parameterization of  $f_v$  to get a more accurate vegetation drag  
304 partition effect regardless of whether the Okin (2008) or the Raupach et al. (1993) scheme is used.  
305 Alternatively, LSMs could also read in observed  $f_v$  from available satellite-derived products such

306 as MODIS or AVHRR  $f_v$ , as done by Wu et al. (2016) for instance. We used the observed/modeled  
307 LAI instead of observed  $f_v$ , because LSMs actively simulate LAI, allowing the scheme to be used  
308 in past and future climates when vegetation cover observations are not available.

309 A fourth important limitation is that O08 does not fundamentally distinguish the drag  
310 partitioning between different plant functional types (PFTs). O08 assumes that all short plants are  
311 hemispheric in shape and produce the same  $f_{eff,v}$  if they have the same  $f_v$  or LAI. In reality, short  
312 plants such as shrubs, herbaceous plants, and crops have vastly different shapes; some are far from  
313 hemispheric and can hardly be approximated by a simple geometry or shape. Nonetheless, this  
314 limitation is not unique to O08 but shared by other drag partition schemes such as Raupach et al.  
315 (1993), as their  $f_{eff,v}$  equations are also functions of  $f_v$  only and not functions of PFTs. More  
316 research is thus warranted in the future to better quantify the plant shapes and  $f_{eff,v}$  of different  
317 PFTs.

318  
319

### 320 **6.3. Dust emission intermittency scheme**

321 There are two important caveats about the Comola et al. (2019b) intermittency scheme.  
322 The first caveat is that it has exponential dependences on  $u_{*s}$ ,  $\sigma_{\tilde{u}_s}$ ,  $u_{*it}$ , and  $u_{*ft}$  (see Sect. S3) and  
323 is thus very sensitive and vulnerable to the accuracy of the GCM simulations of the four variables.  
324 For instance, if the thresholds are overestimated by the threshold schemes, not only will emissions  
325 be underestimated but  $\eta$  from C19 will also be close to zero and further worsen the low bias of the  
326 dust emissions. Therefore, a prerequisite of employing the C19 scheme is that the wind  $u_{*s}$  and  
327 the thresholds should be adequately simulated and have reasonable ranges of variability throughout  
328 the year. If simulated well,  $\eta$  will have reasonable day-to-day and seasonal fluctuations. Otherwise,  
329  $\eta$  can constantly fall on one or zero and become unindicative of the boundary-layer dynamics  
330 temporal variability, and the resulting  $\eta$  time series will further impact and worsen the temporal  
331 variability of the  $F_{d,\eta}$  time series.

332 There is a second caveat about a technical flaw in C19. When  $u_{*s} < u_{*it}$  in a time step,  
333 while Comola's theory allows turbulence to generate instantaneous winds  $\tilde{u}_s$  that exceed the  
334 impact and fluid thresholds and generate some emissions (even when the averaged  $u_{*s} < u_{*it}$   
335 across the model timestep), the setup in Eq. S3 by nature could not allow emissions when  $u_{*s} <$   
336  $u_{*it}$ . C19 allows  $\eta > 0$  (per Eq. S5) when  $u_{*s} < u_{*it}$ . However, the way C19 was parameterized  
337 was such that C19 still depends on conventional dust emission equations such as Kok et al. (2014b)  
338 or Zender et al. (2003a), which by nature prohibit emissions when the mean  $u_{*s} < u_{*it}$  within a  
339 model time step (Eq. S3). This means that the C19 theory and the C19 dust emission  
340 parameterization contain an internal logical inconsistency, and the C19 scheme per se still does  
341 not generate emissions  $F_{d,\eta}$  (Eq. S3b) for  $u_{*s} < u_{*it}$  ( $\eta > 0$  per Eq. S5, but  $F_{d,\eta} = \eta F_d = 0$  since  
342  $F_d = 0$  per Eq. S3). But, because the turbulent emissions in the  $u_{*s} < u_{*it}$  regime is small, the  
343 C19 formulation is still a good approximation for turbulent emissions, performing much better  
344 than the conventional timestep-constant models as demonstrated in Comola et al. (2019b).

345  
346  
347

### 348 **6.4 Reducing the grid scale-dependence of dust emission simulations**

349 We produced the correction maps to scale the spatial variability of the low-resolution dust  
350 emission simulations, matching the spatial variability of the high-resolution emissions (Fig. 9) to

351 reduce the scale-dependence of dust emission simulations. As such, it is an alternative to the  
352 computationally expensive but more fundamental solution of simulating dust emissions in the  
353 highest model resolution possible and then regrid to coarser resolution. Employing the scaling map  
354  $\tilde{K}_c$  is different from the fundamental solution in the sense that the maps in Fig. 9 are time-  
355 independent and derived by matching the annual total high-resolution emissions (Sect. 4.2). As  
356 seen in Fig. S10, the scaling map exhibits a moderate degree of seasonality, but employing an  
357 annual scaling map like Fig. 9 will already address a large part of the scale-dependence problem.  
358 We suggest GCMs and CTMs, which focus on present-day simulations, perform multiyear  
359 simulations in both high and native grid resolutions to obtain monthly climatological maps of  
360 scaling factors for present-day dust emission simulations. Afterwards, ESMs only need to read in  
361 the climatological monthly scaling maps to rescale the native grid dust emissions every month  
362 before passing the dust emissions to the atmospheric model component. If desired, instead of  
363 generating climatological maps, models can even choose to obtain transient (e.g., monthly)  $\tilde{K}_c$   
364 maps as a time series for the past decades of the historical period (e.g., 1980–2020) so that the  
365 scaling maps contain a much better temporal variability in terms of seasonality, interannual and  
366 decadal variability, of the historical dust emissions than compared with the climatological scaling  
367 maps.

368 Our proposed approach is an alternative to a more common approach, which is to employ  
369 a Weibull distribution to the GCM winds (Cakmur et al., 2004; Grini et al., 2005; Cowie et al.,  
370 2015; Zhang et al., 2016; Menut, 2018; Tai et al., 2021). In the Weibull approach, in each time  
371 step the model assumes a Weibull PDF for each grid that is characterized by the modeled mean  
372 wind speed and a shape parameter  $k$  representing the subgrid wind variability.  $k$  could be a global  
373 constant (e.g.,  $k = 4$  in Menut, 2018), a parameterized function of the model mean wind speed (e.g.,  
374 Grini et al., 2005), or a globally gridded map obtained by comparing coarse winds against high-  
375 resolution winds (Ridley et al., 2013; Tai et al., 2021). A distinction between our approach and the  
376 Weibull approach is that while previous studies derived the shape parameter by comparing high-  
377 and low-resolution winds (e.g., Tai et al., 2021), we directly make use of the high- and low-  
378 resolution input fields to calculate dust emissions (Figs. 8c and d) and then compare between the  
379 high- and low-resolution emissions. Therefore, the correction map  $\tilde{K}_c$  (Fig. 9) captures subgrid  
380 wind variability due to subgrid spatial characteristics just like  $k$  in the Weibull approach, and thus  
381 we anticipate some intrinsic spatial correlations between the  $\tilde{K}_c$  and  $k$  maps.

382 However, there are three distinctions and advantages of our approach over the Weibull  
383 approach. The first and the most important one is that our approach accounts for not only the  
384 subgrid variability of wind but all other fields ( $u_{*s}$ ,  $w$ , LAI, etc).  $\tilde{K}_c$  is obtained via comparing  
385 emissions across resolutions and thus its magnitude is a result of the subgrid variability of all input  
386 fields, whereas in Tai et al. (2021) the  $k$  is obtained via comparing winds across resolutions and  
387 thus only captures subgrid wind variability. The second advantage is that our approach makes no  
388 assumption about the distributions of the subgrid variability of forcings. The Weibull approach is  
389 a parametric statistical method, which means the dust models need to assume the subgrid winds  
390 follow a Weibull distribution, but the subgrid spatial wind variability can deviate substantially  
391 from a Weibull distribution due to several reasons, such as complex terrain (Jiménez et al., 2011).  
392 Our method is non-parametric and thus more robust in capturing subgrid variability of multiple  
393 input fields at once. The third advantage is that our approach saves computational cost because it  
394 only needs to (1) find the  $\tilde{K}_c$  map and (2) directly apply  $\tilde{K}_c$  to correct the coarse emissions.  
395 Meanwhile, past studies needed to (1) find the  $k$  map, (2) iteratively calculate emissions by  
396 looping across the Weibull PDF (3) sum across the PDF to yield the total emission, and (4) update

397 the Weibull PDF for each grid and time step. Repeating step (2) for all times and grids is  
398 computationally very expensive.

399 There is yet another alternative approach to account for subgrid variability of winds and  
400 other parameters. Some CTM studies (e.g., Meng et al., 2021) proposed to simulate dust emissions  
401 at the highest resolution possible and then store the results as a gridded emission inventory. Meng  
402 et al. (2021) proposed that CTMs do not need to simulate dust emissions and instead only need to  
403 regrid the stored gridded dust emissions to the desired grid resolutions. An advantage of their  
404 approach is clearly that their regridded dust emissions will have the correct spatial and temporal  
405 correlations with their high-resolution dust emission inventory, which means there will be no grid  
406 scale-dependence problem in their approach. Their approach also saves time and computational  
407 resources because they do not simulate but just read in and regrid dust emissions. This approach  
408 is particularly favorable for the CTM simulations for air quality forecasts and hindcasts in which  
409 models need to ensure the near-term input meteorological fields are very accurate to generate an  
410 accurate dust emission inventory, such as the air quality forecasts conducted by the Environmental  
411 Protection Agency (EPA) using CMAQ (Appel et al., 2013, 2017), or other CTM studies such as  
412 GEOS-Chem (Zhang et al., 2013; Meng et al., 2021). However, for GCMs/ESMs that care about  
413 long-term simulations and aerosol–climate interactions, there is a need to actively simulate dust  
414 emissions and allow a full coupling between meteorology and dust, which could not be achieved  
415 by feeding the models with an inventory. In that case, our scaling method is likely more desirable  
416 for GCMs and ESMs to reduce the scale-dependence problem.

417 Also, we note that although our approach alleviated the grid-scale dependence of dust  
418 emissions, the grid-scale dependence problem also appears in other component of dust cycle  
419 simulations, such as in dust transport. The grid-scale dependence can be due to not just the  
420 averaging problem but also other problems, such as numerical diffusion which worsens with  
421 increasing grid size in an Eulerian GCM (Rastigejev et al., 2010; Eastham and Jacob, 2017; Zhuang  
422 et al., 2018). It has to be solved in the atmospheric model component such as by some adaptive  
423 mesh refinement approaches (e.g., Semakin and Rastigejev, 2016) or machine learning methods  
424 (e.g., Zhuang et al., 2021).

425

426 Table S1. Past studies employed in this paper that collected dry soil aggregate size distributions  
 427 over different countries.

| Study                      | Number of samples we used | Location of the sites                           | Aridity <sup>a</sup> |
|----------------------------|---------------------------|-------------------------------------------------|----------------------|
| Ciric et al. (2012)        | 5                         | Pannonian Basin, Serbia                         | nonarid              |
| Li et al. (2014)           | 4                         | Tarim Basin                                     | arid                 |
| Wagner et al. (1992)       | 2                         | Kansas                                          | arid                 |
| Chandler et al. (2004)     | 3                         | Columbia Plateau                                | arid                 |
| Mei et al. (2004)          | 4                         | Northern China                                  | arid                 |
| Swet and Katra (2016)      | 2                         | Negev, Israel                                   | arid                 |
| Mirzamostafa et al. (1998) | 2                         | Kansas                                          | nonarid              |
| Liu et al. (1998)          | 3                         | Inner Mongolian Plateau & Tengger Desert, China | arid                 |
| Kalhor et al. (2017)       | 6                         | Loess Plateau                                   | nonarid              |
| Su et al. (2007)           | 4                         | Hexi Corridor                                   | arid                 |
| Udom and Ogunwole (2015)   | 4                         | Port Harcourt, Nigeria                          | nonarid              |
| Malobane et al. (2019)     | 2                         | University of Fort Hare                         | nonarid              |
| Klose et al. (2017)        | 5                         | New Mexico                                      | arid                 |
| Shao et al. (2011)         | 1                         | Victoria, Australia                             | arid                 |

428 <sup>a</sup>The aridity of the sampling site was classified by this study based on whether the annual mean MERRA-2 LAI (see Fig. 3a in  
 429 the main text) is smaller or larger than 1.

430  
 431  
 432  
 433  
 434  
 435

Table S2. The global total redistributions in the normalized emissions from each modification.

|         | Using $\bar{D}_p = 127 \mu\text{m}^a$ | Including $F_{eff}^b$    | Including the intermittency <sup>c</sup> | Our scheme compared with K14 <sup>d</sup> |
|---------|---------------------------------------|--------------------------|------------------------------------------|-------------------------------------------|
| Arid    | 216 Tg yr <sup>-1</sup>               | 3257 Tg yr <sup>-1</sup> | 3075 Tg yr <sup>-1</sup>                 | 3663 Tg yr <sup>-1</sup>                  |
| Nonarid | 34 Tg yr <sup>-1</sup>                | 354 Tg yr <sup>-1</sup>  | 87 Tg yr <sup>-1</sup>                   | 395 Tg yr <sup>-1</sup>                   |
| Globe   | 250 Tg yr <sup>-1</sup>               | 3611 Tg yr <sup>-1</sup> | 3163 Tg yr <sup>-1</sup>                 | 4058 Tg yr <sup>-1</sup>                  |

436 <sup>a</sup>Normalized Expt. II minus normalized Expt. I (Fig. S7a).  
 437 <sup>b</sup>Normalized Expt. III minus normalized Expt. II (Fig. S7b).  
 438 <sup>c</sup>Normalized Expt. V minus normalized Expt. III (Fig. S7e).  
 439 <sup>d</sup>Normalized Expt. V minus normalized Expt. I (Fig. S7f).

440  
 441  
 442  
 443

444  
445  
446

Table S3. The global total emissions all simulations schemes and their contributions from arid and nonarid regions.

|            | Original emissions        | Normalized emissions     | % of emissions from arid regions | % of emissions of nonarid regions |
|------------|---------------------------|--------------------------|----------------------------------|-----------------------------------|
| K14        | 29254 Tg yr <sup>-1</sup> | 5000 Tg yr <sup>-1</sup> | 92.1 %                           | 7.9 %                             |
| Our scheme | 11494 Tg yr <sup>-1</sup> | 5000 Tg yr <sup>-1</sup> | 97.8 %                           | 2.2 %                             |
| MERRA-2    | 1561 Tg yr <sup>-1</sup>  | 5000 Tg yr <sup>-1</sup> | 97.3 %                           | 2.7 %                             |
| Z03-Z      | 424 Tg yr <sup>-1</sup>   | 5000 Tg yr <sup>-1</sup> | 100 %                            | 0 %                               |
| Z03-G      | 442 Tg yr <sup>-1</sup>   | 5000 Tg yr <sup>-1</sup> | 100 %                            | 0 %                               |

447  
448  
449  
450

Table S4. Regional contributions of dust emissions to the global total emission for different schemes. <sup>a, b</sup>

|                         | DustCOM M & B16 <sup>c</sup> | K14    | Our scheme | Z03-Z  | Z03-G  | MERRA-2 |
|-------------------------|------------------------------|--------|------------|--------|--------|---------|
| NW Africa               | 18 %                         | 10.4 % | 14.4 %     | 7.5 %  | 23.2 % | 20.1 %  |
| NE Africa               | 16 %                         | 17.5 % | 14.5 %     | 13.3 % | 17.9 % | 17.1 %  |
| Sahel                   | 13 %                         | 17.4 % | 15.9 %     | 20.8 % | 16.5 % | 21.5 %  |
| Middle East / C Asia    | 29 %                         | 29.4 % | 30.6 %     | 32.5 % | 31.3 % | 29.2 %  |
| E Asia                  | 13 %                         | 4.1 %  | 11.9 %     | 14.3 % | 4.0 %  | 6.5 %   |
| N America               | 3 %                          | 1.8 %  | 1.1 %      | 0.1 %  | 0.02 % | 0.5 %   |
| Australia               | 3 %                          | 10.8 % | 6.4 %      | 9.7 %  | 6.8 %  | 2.6 %   |
| S America               | 4 %                          | 2.3 %  | 2.2 %      | 0.5 %  | 0.07 % | 1.7 %   |
| S Africa                | 2 %                          | 6.3 %  | 3.0 %      | 1.4 %  | 0.3 %  | 0.7 %   |
| high-lat (w/ Patagonia) | 5 % (from B16)               | 2.8 %  | 6.3 %      | 0.2 %  | 0.2 %  | 1.7 %   |

451  
452  
453  
454  
455  
456  
457  
458  
459

<sup>a</sup>All percentages from MERRA-2 and our simulations are rounded to 1 decimal place, except for smaller values where we rounded to 2 decimal places.

<sup>b</sup>Bullard et al. (2016) obtained 5 % including Patagonia emissions, which overlaps with the S. America domain defined in Kok et al. (2021a, b). We present the percentage here assuming the nine K21 source regions sum up to be 100 %, since K21 (DustCOMM) predicted zero emissions outside of the domains (including B16 will yield 105 %). We arrange the other columns the same way such that the percentages from the nine K21 regions sum up to 100 % also.

<sup>c</sup>Values are directly obtained from Table 2 of Kok et al. (2021b), which were rounded up to integers, except for high-latitude emissions that are obtained from Bullard et al. (2016).

460  
461  
462  
463

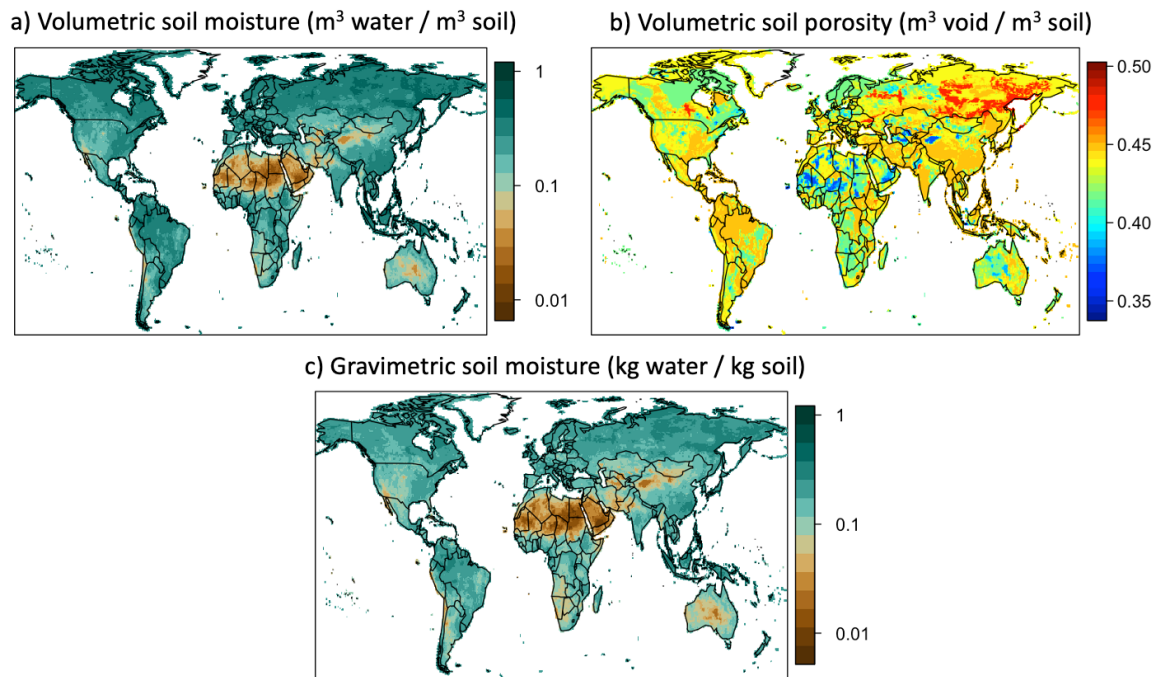

465  
466  
467  
468  
469  
470

Figure S1. MERRA-2 soil moisture for the year 2006 used in this study. (a) Volumetric soil moisture ( $\text{m}^3 \text{ m}^{-3}$ ), (b) soil porosity, and (c) gravimetric soil moisture ( $\text{kg kg}^{-1}$ ).

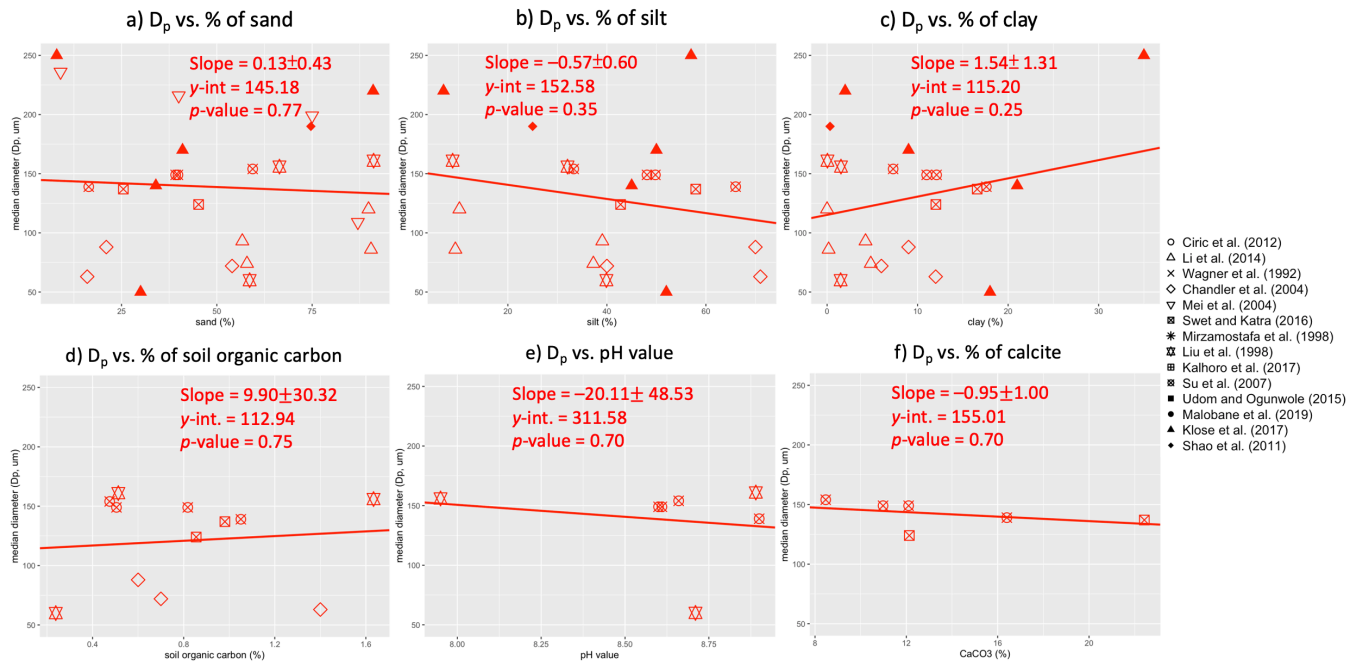

472  
 473  
 474  
 475  
 476  
 477  
 478  
 479  
 480  
 481  
 482  
 483  
 484  
 485

Figure S2. The relationships between soil median diameter  $\bar{D}_p$  and soil texture and other soil properties documented in multiple past studies for arid regions. We relate  $D_p$  to content of (a) sand, (b) silt, (c) clay in %, as well as to (d) soil organic carbon (SOC) content in %, (e) pH value, and (f) % of calcite ( $\text{CaCO}_3$ ). The symbols show the name of each individual study and lines denote linear regressions for which statistics are included for each panel. Studies may not have documented certain texture or properties, so some plots have fewer data points (especially for soil properties).

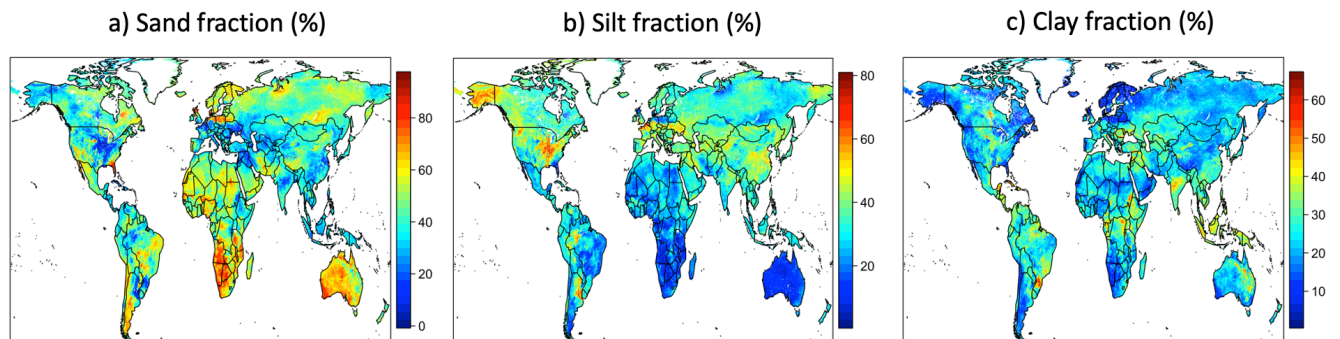

486  
 487  
 488  
 489  
 490  
 491

Figure S3. The SoilGrids global  $0.1^\circ \times 0.1^\circ$  maps of (a) sand, (b) silt, and (c) clay in % (Hengl et al., 2017).



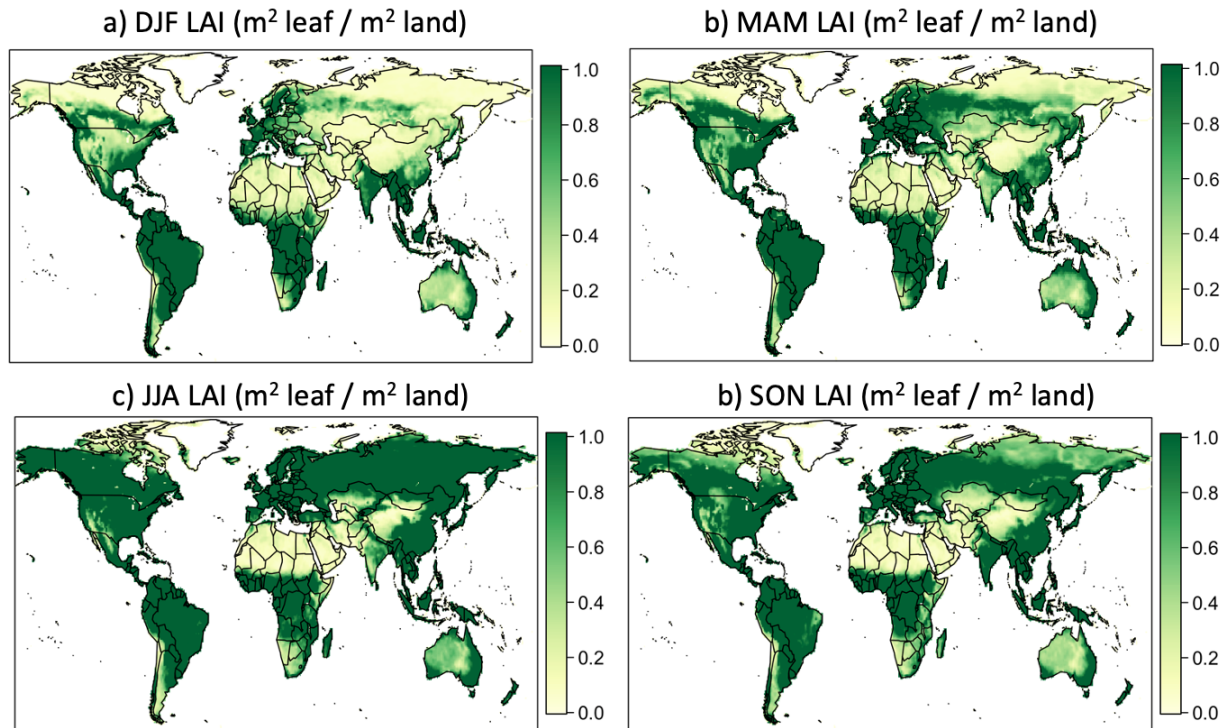

493  
 494  
 495  
 496  
 497  
 498  
 499  
 500

Figure S4. Global distributions of MERRA-2 seasonal mean LAI for the year 2006. Four seasonal mean LAI maps are plotted, including the (a) December–January–February, (b) March–April–May, (c) June–July–August, and (d) September–October–November. The color bar saturates at 1, so regions in dark green color have LAI > 1 and are defined as non-arid area in this study.

### Annual mean $\eta$

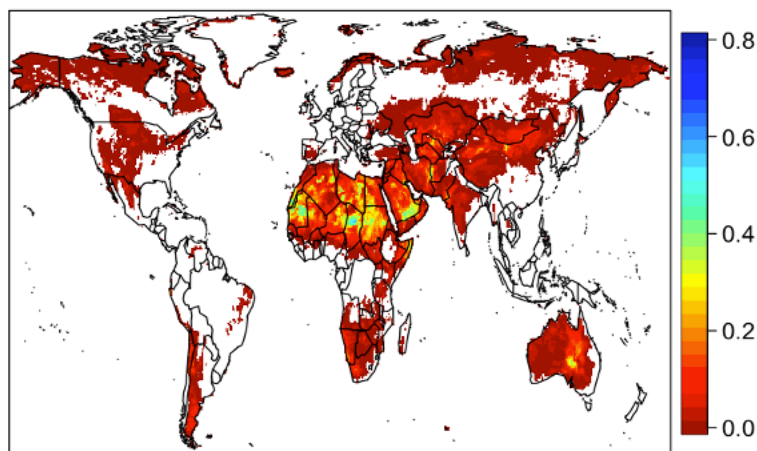

501  
 502  
 503  
 504  
 505

Figure S5. The annual mean intermittency factor  $\eta$ , which denotes the fraction of time within a time step that emission is active, averaged over the whole year 2006.

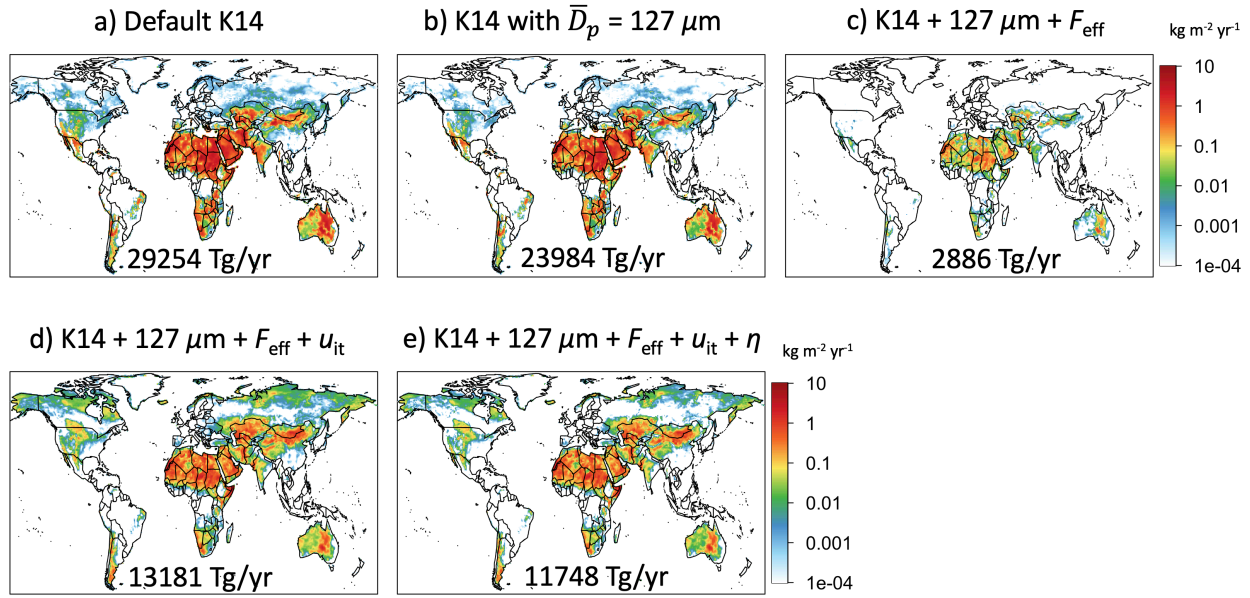

506  
 507 Figure S6. Spatial patterns of the unnormalized dust emission flux for each modification of the  
 508 default dust emission scheme. The plots include results for the (a) default K14 scheme (expt. I),  
 509 (b) K14 with changed soil particle diameter only (expt. II), (c) K14 with the new soil particle  
 510 diameter and drag partition effect (expt. III), (d) K14 with the new soil particle diameter, drag  
 511 partition effect, and impact threshold (expt. IV), and (e) K14 with all modifications, i.e., our new  
 512 scheme (expt. V). The bottom of each panel notes the unnormalized global total emission in Tg yr<sup>-1</sup>.  
 513

514  
 515  
 516  
 517  
 518  
 519

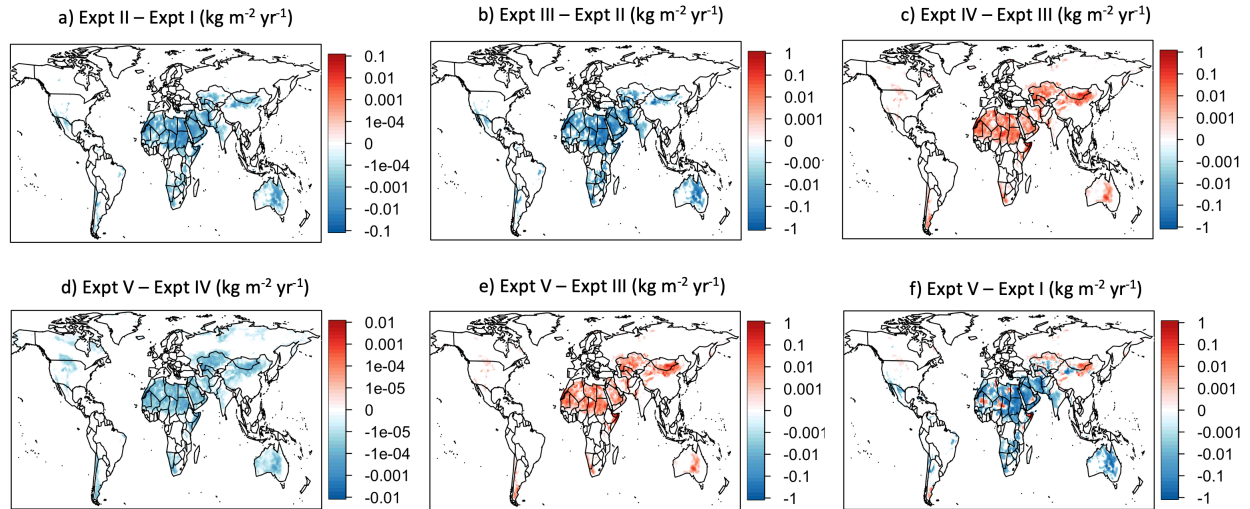

520  
 521 Figure S7. The effects of the proposed improvements to the parameterization of dust emissions on  
 522 the default (Kok et al., 2014a, b) dust emission scheme. Maps of unnormalized emission  
 523 differences with individual improvements added on top of the default K14 scheme. The individual  
 524 improvements are respectively (a) changing the soil median diameter to  $127 \mu\text{m}$  (expt. II), (b)  
 525 including the drag partition effect (expt. III), (c) employing the impact threshold, (d) applying the  
 526 intermittency factor, and (e) including the Comola et al. (2019b) intermittency scheme, a  
 527 combination of (c, d). (f) Maps of unnormalized emission differences between our new scheme  
 528 and the K14 scheme. The color bars of the maps of differences are drawn to  $\log_{10}$  scale.

529  
 530  
 531  
 532  
 533  
 534  
 535  
 536

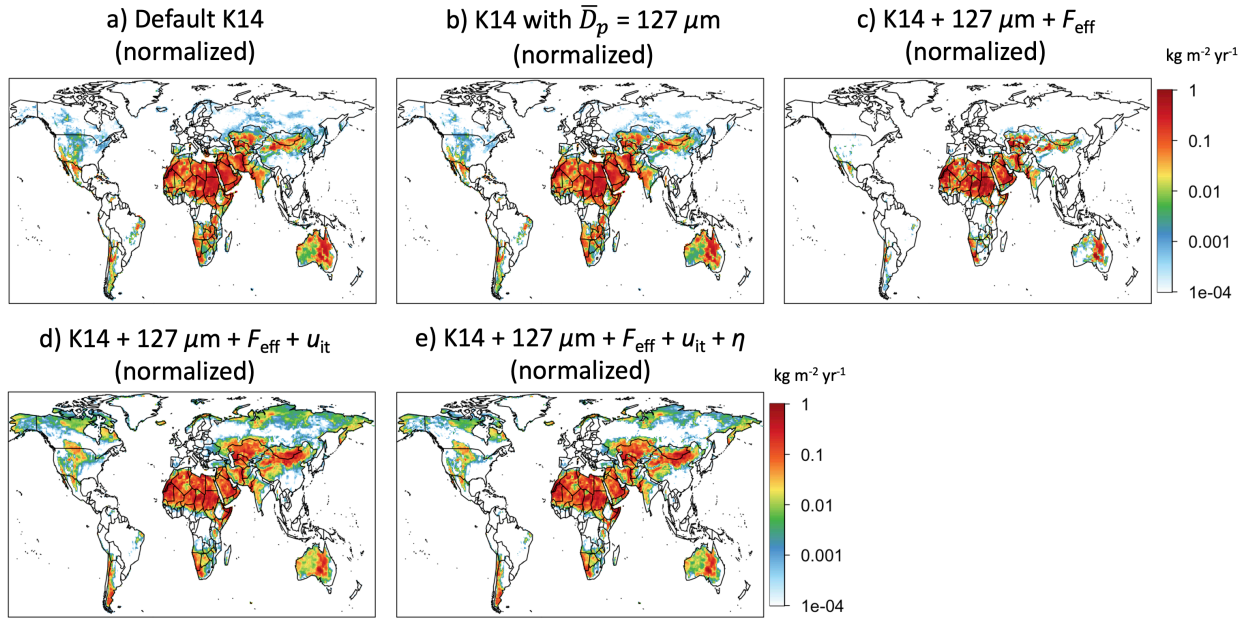

537  
 538 Figure S8. Spatial patterns of the normalized dust emission flux for each modification of the default  
 539 dust emission scheme (same as Figure S6 but normalized). The plots include results for the (a)  
 540 default K14 scheme (expt. I), (b) K14 with changed soil particle diameter only (expt. II), (c) K14  
 541 with the new soil particle diameter and drag partition effect (expt. III), (d) K14 with the new soil  
 542 particle diameter, drag partition effect, and impact threshold (expt. IV), and (e) K14 with all  
 543 modifications, i.e., our new scheme (expt. V). All plots are normalized to have a global total  
 544 emission of  $5000 \text{ Tg yr}^{-1}$ .

545  
 546  
 547  
 548  
 549  
 550

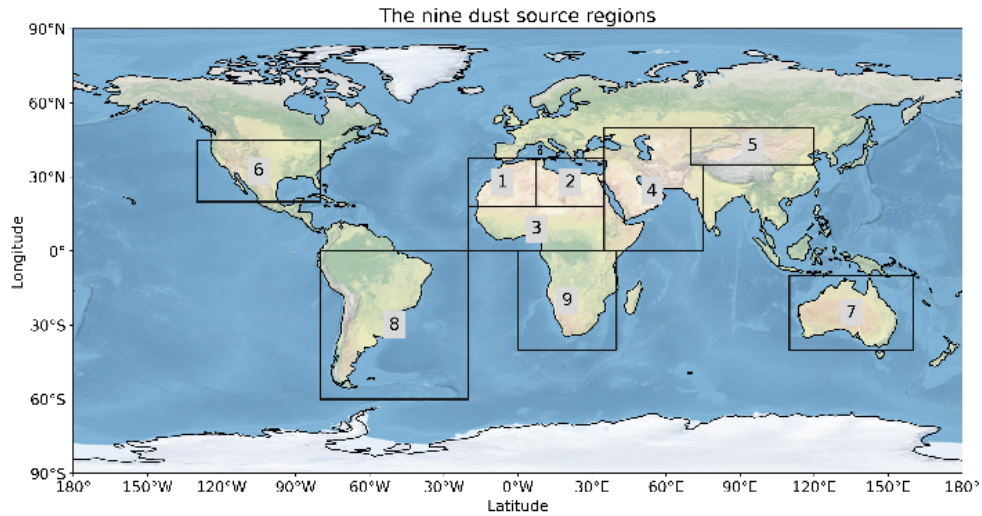

551  
 552 Figure S9. Coordinates of the nine main dust source regions in Kok et al. (2021a) adapted in this  
 553 study. The coordinates of the nine source regions are: (1) western North Africa (20°W – 7.5°E;  
 554 18°N – 37.5°N), (2) eastern North Africa (7.5°E – 35°E; 18°N – 37.5°N), (3) the Sahel (20°W –  
 555 35°E; 0°N – 18°N), (4) Middle East / Central Asia (30°E – 70°E for 0°N – 35°N, and 30 – 75°E  
 556 for 35 – 50°N), (5) East Asia (70°E – 120°E; 35°N – 50°N), (6) North America (130°W – 80°W;  
 557 20°N – 45°N), (7) Australia (110°E – 160°E; 10°S – 40°S), (8) South America (80°W – 20°W;  
 558 0°S – 60°S), and (9) Southern Africa (0°E – 40°E; 0°S – 40°S). The graph is adopted from (Kok  
 559 et al., 2021a).

560  
 561  
 562  
 563

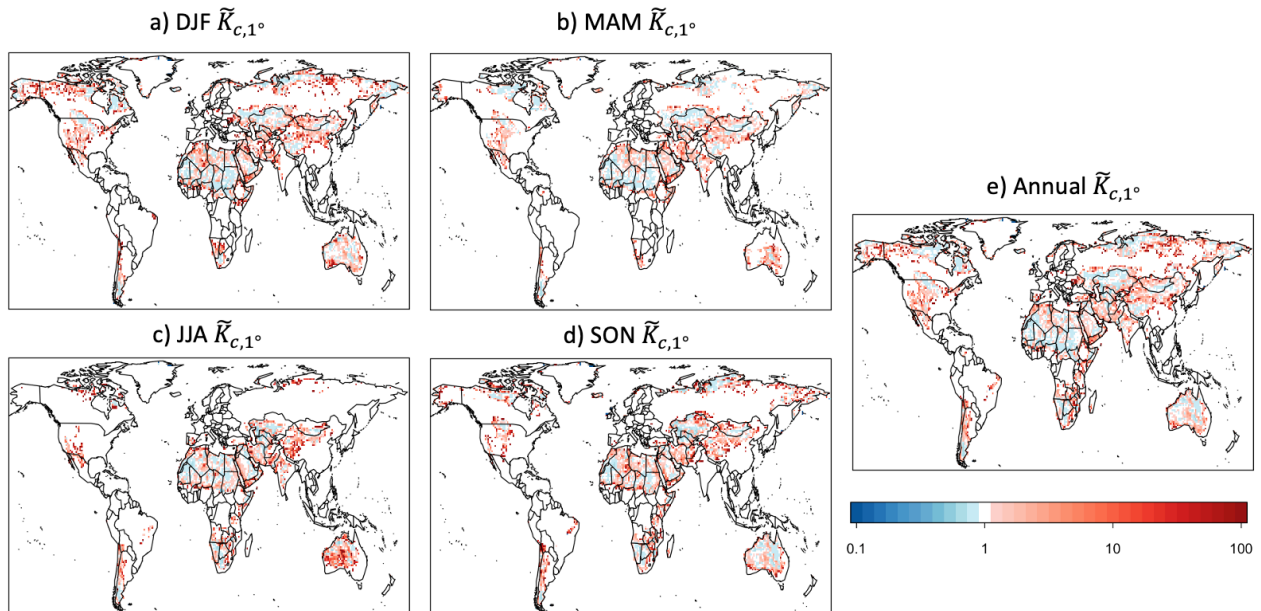

564  
 565 Figure S10. Seasonal variability in the correction map  $\tilde{K}_c$  at a resolution of  $0.9^\circ \times 1.25^\circ$ , for (a)  
 566 December–January–February, (b) March–April–May, (c) June–July–August, (d) September–  
 567 October–November, and (e) the whole year.  
 568

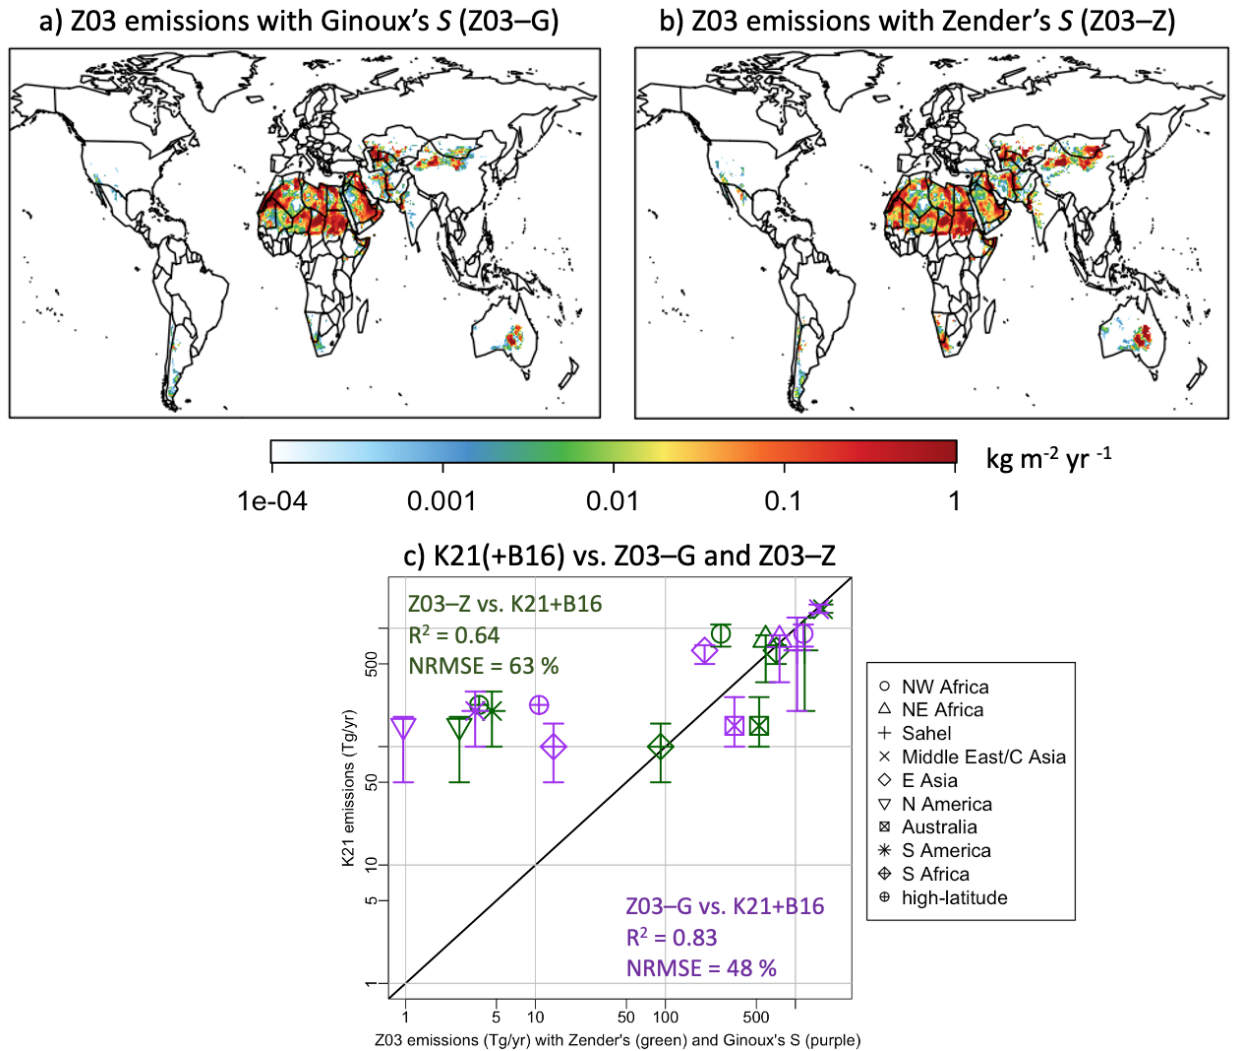

571  
572 Figure S11. (Kok et al., 2021a, b) DustCOMM emissions versus the dust emission simulations  
573 using the (Zender et al., 2003a) scheme with different source functions  $S$ . (a) Globally gridded  
574 Zender et al. (2003a) emissions ( $\text{kg m}^{-2} \text{ yr}^{-1}$ ) with source function  $S$  from Ginoux et al. (2001)  
575 (Z03-G). (b) Globally gridded Zender et al. (2003a) emissions ( $\text{kg m}^{-2} \text{ yr}^{-1}$ ) with source function  
576  $S$  from (Zender et al., 2003b) (Z03-Z). Both (a) and (b) panels are normalized to  $5000 \text{ Tg yr}^{-1}$   
577 annual global total emissions. (c) Kok et al. (2021a, b) DustCOMM regional emissions (obtained  
578 from the fifth column of Table 1 in K21b scaled to a global total of  $5000 \text{ Tg yr}^{-1}$ ) versus the regional  
579 emissions computed by the Z03-G scheme and the Z03-Z scheme. The regional emissions are  
580 obtained following the nine source regions in Fig. 10a, with one extra point being the “high-latitude”  
581 emissions obtained from the Bullard et al. (2016) estimation. The error bars show one standard  
582 error, except that the B16 high-latitude emission does not contain any error estimate. The black  
583 line shows the 1:1 line.

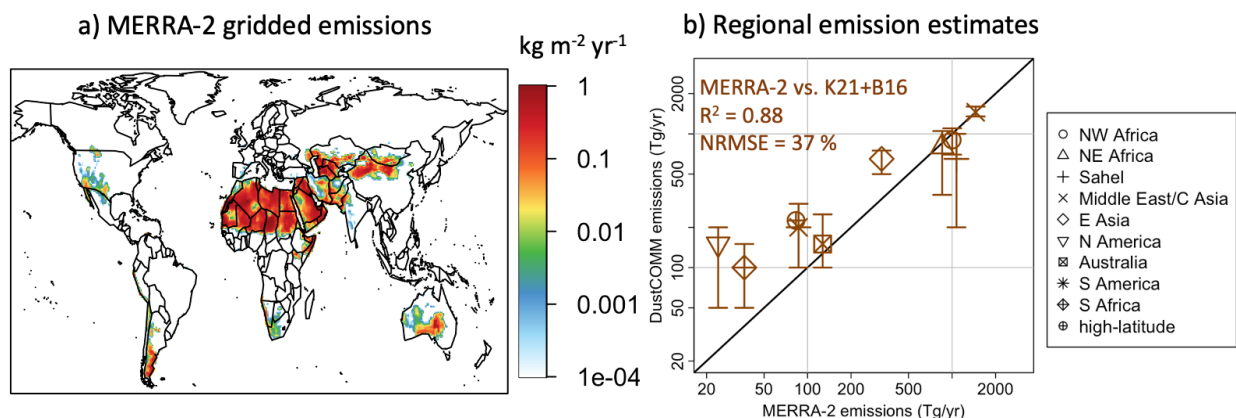

589  
 590 Figure S12. Kok et al. (2021a, b) DustCOMM emissions versus the dust emission simulated by  
 591 MERRA-2 (Gelaro et al., 2017). (a) Globally gridded MERRA-2 emissions (kg m<sup>-2</sup> yr<sup>-1</sup>) using  
 592 GOCART (Ginoux et al., 2001). Emissions in (a) are normalized to 5000 Tg yr<sup>-1</sup> annual global  
 593 total emissions. (c) Kok et al. (2021a, b) DustCOMM regional emissions (obtained from the fifth  
 594 column of Table 1 in K21b scaled to a global total of 5000 Tg yr<sup>-1</sup>) versus the regional emissions  
 595 simulated by MERRA-2. The regional emissions are obtained following the nine source regions  
 596 in Fig. 10a, with one extra point being the “high-latitude” emissions obtained from the Bullard et  
 597 al. (2016) estimation. The error bars show one standard error, except that the B16 high-latitude  
 598 emission does not contain any error estimate. The black line shows the 1:1 line.

599

600

601

602

603

604

605

606

607

608

609

610

611

612

613

614

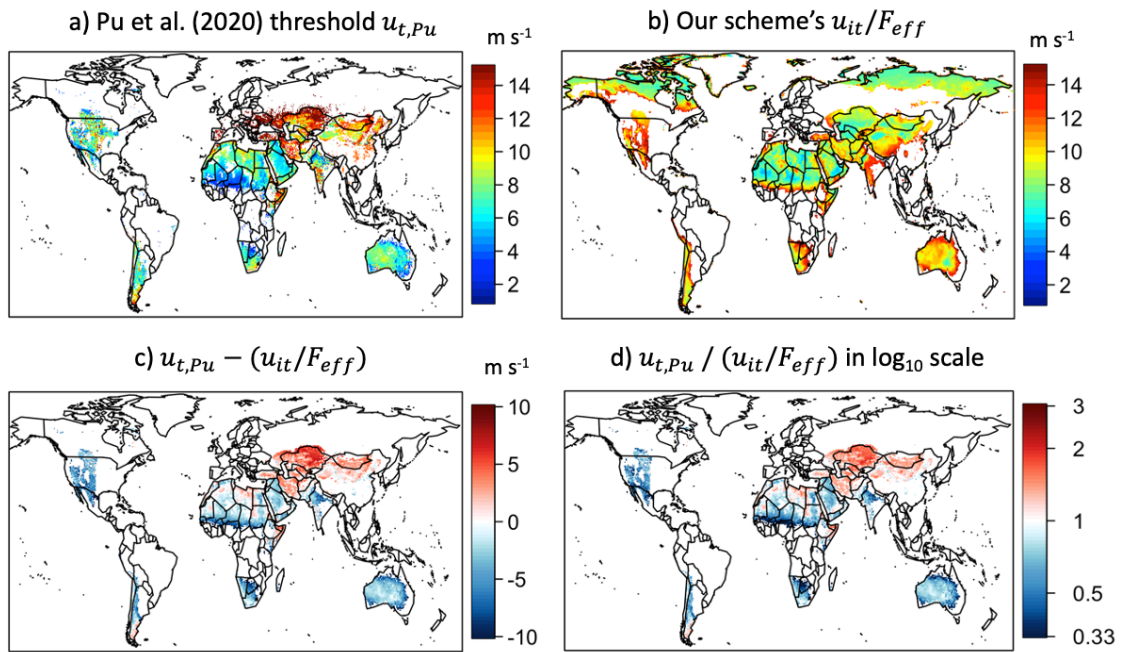

616  
 617 Figure S13. Comparison between the dust emission threshold simulated in this study and the  
 618 observationally derived dust emission threshold from Pu et al. (2020). (a) Pu et al. (2020) threshold  
 619 wind speed at 10 m height ( $u_{t,Pu}$ , m s<sup>-1</sup>). (b) The simulated impact threshold friction velocity  $u_{*it}$   
 620 modified by the simulated hybrid drag partition effect,  $u_{it}/F_{eff}$  (m s<sup>-1</sup>), from this study. The  
 621 impact threshold was translated from a  $u_{*it}$  to  $u_{it}$  at 10 m height using the log law of the wall. (c)  
 622 The differences between  $u_{t,Pu}$  and  $u_{it}/F_{eff}$ . (d) The ratio between the two thresholds, with color  
 623 bar drawn to log<sub>10</sub> scale.

624  
 625  
 626  
 627  
 628  
 629  
 630



631

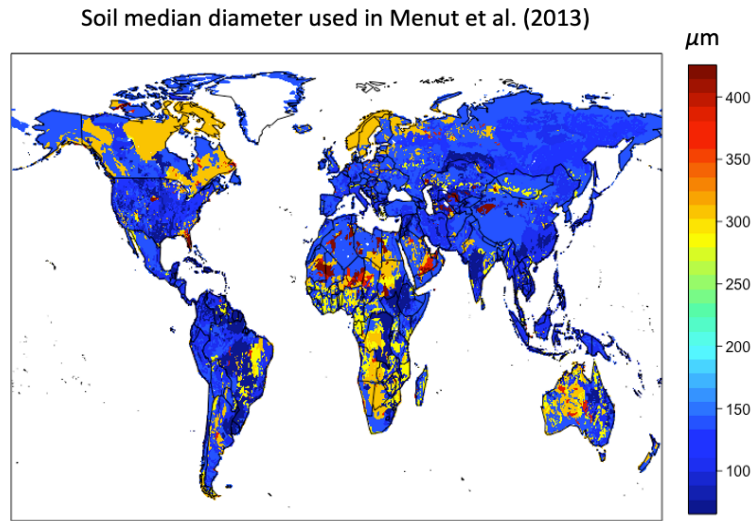

632

633 Figure S14. Soil median diameter  $\bar{D}_p$  used in Menut et al. (2013) as an input of the CHIMERE  
634 chemical transport model, for the dust emission threshold and drag partition effect calculations.

635

636

637

638

639

640

2006 annual mean MERRA-2 friction velocity (m/s)

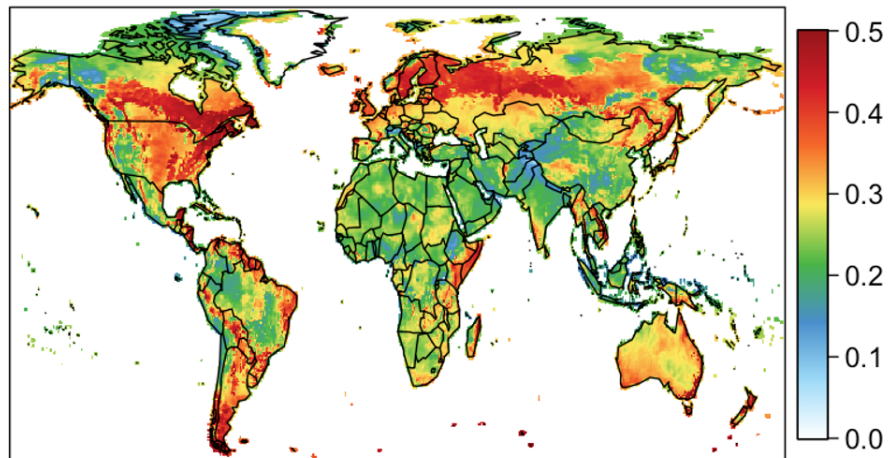

641

642 Figure S15. Global distributions of MERRA-2 friction velocity  $u_*$  for the year 2006.

643

644

645 **References**

646

647 Andreas, E. L., Claffey, K. J., Jordan, R. E., Fairall, C. W., Guest, P. S., Persson, P. O. G., and  
648 Grachev, A. A.: Evaluations of the von Kármán constant in the atmospheric surface layer,  
649 *Journal of Fluid Mechanics*, 559, 117–149, <https://doi.org/10.1017/S0022112006000164>,  
650 2006.

651 Appel, K. W., Pouliot, G. A., Simon, H., Sarwar, G., Pye, H. O. T., Napelenok, S. L., Akhtar, F.,  
652 and Roselle, S. J.: Evaluation of dust and trace metal estimates from the Community  
653 Multiscale Air Quality (CMAQ) model version 5.0, *Geosci. Model Dev.*, 6, 883–899,  
654 <https://doi.org/10.5194/gmd-6-883-2013>, 2013.

655 Appel, K. W., Napelenok, S. L., Foley, K. M., Pye, H. O. T., Hogrefe, C., Luecken, D. J., Bash,  
656 J. O., Roselle, S. J., Pleim, J. E., Foroutan, H., Hutzell, W. T., Pouliot, G. A., Sarwar, G.,  
657 Fahey, K. M., Gantt, B., Gilliam, R. C., Heath, N. K., Kang, D., Mathur, R., Schwede, D.  
658 B., Spero, T. L., Wong, D. C., and Young, J. O.: Description and evaluation of the  
659 Community Multiscale Air Quality (CMAQ) modeling system version 5.1, *Geosci.*  
660 *Model Dev.*, 10, 1703–1732, <https://doi.org/10.5194/gmd-10-1703-2017>, 2017.

661 Bonan, G.: *Ecological Climatology: Concepts and Applications*, 3rd ed., Cambridge University  
662 Press, <https://doi.org/10.1017/CBO9781107339200>, 2015.

663 Bullard, J. E., Baddock, M., Bradwell, T., Crusius, J., Darlington, E., Gaiero, D., Gassó, S.,  
664 Gisladdottir, G., Hodgkins, R., McCulloch, R., McKenna-Neuman, C., Mockford, T.,  
665 Stewart, H., and Thorsteinsson, T.: High-latitude dust in the Earth system, *Reviews of*  
666 *Geophysics*, 54, 447–485, <https://doi.org/10.1002/2016RG000518>, 2016.

667 Cakmur, R. V., Miller, R. L., and Torres, O.: Incorporating the effect of small-scale circulations  
668 upon dust emission in an atmospheric general circulation model, *Journal of Geophysical*  
669 *Research: Atmospheres*, 109, <https://doi.org/10.1029/2003JD004067>, 2004.

670 Chandler, D. G., Saxton, K. E., and Busacca, A. J.: Predicting Wind Erodibility of Loessial Soils  
671 in the Pacific Northwest by Particle Sizing, *Arid Land Research and Management*, 19,  
672 13–27, <https://doi.org/10.1080/15324980590887074>, 2004.

673 Chatenet, B., Marticorena, B., Gomes, L., and Bergametti, G.: Assessing the microped size  
674 distributions of desert soils erodible by wind, *Sedimentology*, 43, 901–911,  
675 <https://doi.org/10.1111/j.1365-3091.1996.tb01509.x>, 1996.

676 Chu, C. R., Parlange, M. B., Katul, G. G., and Albertson, J. D.: Probability density functions of  
677 turbulent velocity and temperature in the atmospheric surface layer, *Water Resources*  
678 *Research*, 32, 1681–1688, <https://doi.org/10.1029/96WR00287>, 1996.

679 Ciric, V., Manojlovic, M., Nesic, L., and Belic, M.: Soil dry aggregate size distribution: effects  
680 of soil type and land use, *J. Soil Sci. Plant Nutr.*, 0–0, [https://doi.org/10.4067/S0718-](https://doi.org/10.4067/S0718-95162012005000025)  
681 [95162012005000025](https://doi.org/10.4067/S0718-95162012005000025), 2012.

682 Comola, F., Kok, J. F., Chamecki, M., and Martin, R. L.: The Intermittency of Wind-Driven  
683 Sand Transport, *Geophysical Research Letters*, 46, 13430–13440,  
684 <https://doi.org/10.1029/2019GL085739>, 2019.

685 Cowie, S. M., Marsham, J. H., and Knippertz, P.: The importance of rare, high-wind events for  
686 dust uplift in northern Africa, *Geophysical Research Letters*, 42, 8208–8215,  
687 <https://doi.org/10.1002/2015GL065819>, 2015.

688 Darmenova, K., Sokolik, I. N., Shao, Y., Marticorena, B., and Bergametti, G.: Development of a  
689 physically based dust emission module within the Weather Research and Forecasting  
690 (WRF) model: Assessment of dust emission parameterizations and input parameters for

691 source regions in Central and East Asia, *Journal of Geophysical Research: Atmospheres*,  
692 114, <https://doi.org/10.1029/2008JD011236>, 2009.

693 Eastham, S. D. and Jacob, D. J.: Limits on the ability of global Eulerian models to resolve  
694 intercontinental transport of chemical plumes, *Atmospheric Chemistry and Physics*, 17,  
695 2543–2553, <https://doi.org/10.5194/acp-17-2543-2017>, 2017.

696 FAO/IIASA/ISRIC/ISS-CAS/JRC: Harmonized World Soil Database (version1.2), 2012.

697 Foroutan, H., Young, J., Napelenok, S., Ran, L., Appel, K. W., Gilliam, R. C., and Pleim, J. E.:  
698 Development and evaluation of a physics-based windblown dust emission scheme  
699 implemented in the CMAQ modeling system, *Journal of Advances in Modeling Earth  
700 Systems*, 9, 585–608, <https://doi.org/10.1002/2016MS000823>, 2017.

701 Gelaro, R., McCarty, W., Suárez, M. J., Todling, R., Molod, A., Takacs, L., Randles, C. A.,  
702 Darmenov, A., Bosilovich, M. G., Reichle, R., Wargan, K., Coy, L., Cullather, R.,  
703 Draper, C., Akella, S., Buchard, V., Conaty, A., Silva, A. M. da, Gu, W., Kim, G.-K.,  
704 Koster, R., Lucchesi, R., Merkova, D., Nielsen, J. E., Partyka, G., Pawson, S., Putman,  
705 W., Rienecker, M., Schubert, S. D., Sienkiewicz, M., and Zhao, B.: The Modern-Era  
706 Retrospective Analysis for Research and Applications, Version 2 (MERRA-2), *Journal of  
707 Climate*, 30, 5419–5454, <https://doi.org/10.1175/JCLI-D-16-0758.1>, 2017.

708 Ginoux, P., Chin, M., Tegen, I., Prospero, J. M., Holben, B., Dubovik, O., and Lin, S.-J.: Sources  
709 and distributions of dust aerosols simulated with the GOCART model, *Journal of  
710 Geophysical Research: Atmospheres*, 106, 20255–20273,  
711 <https://doi.org/10.1029/2000JD000053>, 2001.

712 Grini, A., Myhre, G., Zender, C. S., and Isaksen, I. S. A.: Model simulations of dust sources and  
713 transport in the global atmosphere: Effects of soil erodibility and wind speed variability,  
714 *Journal of Geophysical Research: Atmospheres*, 110,  
715 <https://doi.org/10.1029/2004JD005037>, 2005.

716 Hengl, T., Jesus, J. M. de, Heuvelink, G. B. M., Gonzalez, M. R., Kilibarda, M., Blagotić, A.,  
717 Shangguan, W., Wright, M. N., Geng, X., Bauer-Marschallinger, B., Guevara, M. A.,  
718 Vargas, R., MacMillan, R. A., Batjes, N. H., Leenaars, J. G. B., Ribeiro, E., Wheeler, I.,  
719 Mantel, S., and Kempen, B.: SoilGrids250m: Global gridded soil information based on  
720 machine learning, *PLOS ONE*, 12, e0169748,  
721 <https://doi.org/10.1371/journal.pone.0169748>, 2017.

722 Hillel, D.: *Fundamentals of Soil Physics*, Elsevier, <https://doi.org/10.1016/C2009-0-03109-2>,  
723 1980.

724 Jiménez, P. A., Dudhia, J., and Navarro, J.: On the surface wind speed probability density  
725 function over complex terrain, *Geophysical Research Letters*, 38,  
726 <https://doi.org/10.1029/2011GL049669>, 2011.

727 Kalhoro, S. A., Xu, X., Chen, W., Hua, R., Raza, S., and Ding, K.: Effects of Different Land-Use  
728 Systems on Soil Aggregates: A Case Study of the Loess Plateau (Northern China),  
729 *Sustainability*, 9, 1349, <https://doi.org/10.3390/su9081349>, 2017.

730 Klein Goldewijk, K., Beusen, A., Doelman, J., and Stehfest, E.: Anthropogenic land use  
731 estimates for the Holocene – HYDE 3.2, *Earth Syst. Sci. Data*, 9, 927–953,  
732 <https://doi.org/10.5194/essd-9-927-2017>, 2017.

733 Klose, M., Gill, T. E., Webb, N. P., and Van Zee, J. W.: Field sampling of loose erodible  
734 material: A new system to consider the full particle-size spectrum, *Aeolian Research*, 28,  
735 83–90, <https://doi.org/10.1016/j.aeolia.2017.08.003>, 2017.

736 Klose, M., Jorba, O., Gonçalves Ageitos, M., Escribano, J., Dawson, M. L., Obiso, V., Di  
737 Tomaso, E., Basart, S., Montané Pinto, G., Macchia, F., Ginoux, P., Guerschman, J.,  
738 Prigent, C., Huang, Y., Kok, J. F., Miller, R. L., and Pérez García-Pando, C.: Mineral  
739 dust cycle in the Multiscale Online Nonhydrostatic Atmosphere Chemistry model  
740 (MONARCH) Version 2.0, *Geosci. Model Dev.*, 14, 6403–6444,  
741 <https://doi.org/10.5194/gmd-14-6403-2021>, 2021.

742 Kok, J. F., Mahowald, N. M., Fratini, G., Gillies, J. A., Ishizuka, M., Leys, J. F., Mikami, M.,  
743 Park, M.-S., Park, S.-U., Van Pelt, R. S., and Zobeck, T. M.: An improved dust emission  
744 model – Part 1: Model description and comparison against measurements, *Atmospheric  
745 Chemistry and Physics*, 14, 13023–13041, <https://doi.org/10.5194/acp-14-13023-2014>,  
746 2014a.

747 Kok, J. F., Albani, S., Mahowald, N. M., and Ward, D. S.: An improved dust emission model –  
748 Part 2: Evaluation in the Community Earth System Model, with implications for the use  
749 of dust source functions, *Atmospheric Chemistry and Physics*, 14, 13043–13061,  
750 <https://doi.org/10.5194/acp-14-13043-2014>, 2014b.

751 Kok, J. F., Adebisi, A. A., Albani, S., Balkanski, Y., Checa-Garcia, R., Chin, M., Colarco, P. R.,  
752 Hamilton, D. S., Huang, Y., Ito, A., Klose, M., Leung, D. M., Li, L., Mahowald, N. M.,  
753 Miller, R. L., Obiso, V., Pérez García-Pando, C., Rocha-Lima, A., Wan, J. S., and  
754 Whicker, C. A.: Improved representation of the global dust cycle using observational  
755 constraints on dust properties and abundance, *Atmos. Chem. Phys.*, 21, 8127–8167,  
756 <https://doi.org/10.5194/acp-21-8127-2021>, 2021a.

757 Kok, J. F., Adebisi, A. A., Albani, S., Balkanski, Y., Checa-Garcia, R., Chin, M., Colarco, P. R.,  
758 Hamilton, D. S., Huang, Y., Ito, A., Klose, M., Li, L., Mahowald, N. M., Miller, R. L.,  
759 Obiso, V., Pérez García-Pando, C., Rocha-Lima, A., and Wan, J. S.: Contribution of the  
760 world’s main dust source regions to the global cycle of desert dust, *Atmos. Chem. Phys.*,  
761 21, 8169–8193, <https://doi.org/10.5194/acp-21-8169-2021>, 2021b.

762 Kutzbach, J., Bonan, G., Foley, J., and Harrison, S. P.: Vegetation and soil feedbacks on the  
763 response of the African monsoon to orbital forcing in the early to middle Holocene,  
764 *Nature*, 384, 623–626, <https://doi.org/10.1038/384623a0>, 1996.

765 Laurent, B., Marticorena, B., Bergametti, G., Léon, J. F., and Mahowald, N. M.: Modeling  
766 mineral dust emissions from the Sahara desert using new surface properties and soil  
767 database, *J. Geophys. Res.*, 113, D14218, <https://doi.org/10.1029/2007JD009484>, 2008.

768 Lee, T. R. and Buban, M.: Evaluation of Monin–Obukhov and Bulk Richardson  
769 Parameterizations for Surface–Atmosphere Exchange, *Journal of Applied Meteorology  
770 and Climatology*, 59, 1091–1107, <https://doi.org/10.1175/JAMC-D-19-0057.1>, 2020.

771 Li, X., Feng, G., Sharratt, B. S., Zheng, Z., Pi, H., and Gao, F.: Soil Wind Erodibility Based on  
772 Dry Aggregate-Size Distribution in the Tarim Basin, *Soil Science Society of America  
773 Journal*, 78, 2009–2016, <https://doi.org/10.2136/sssaj2014.06.0235>, 2014.

774 Liu, L., Wang, J., Li, X., Liu, Y., Ta, W., and Peng, H.: Determination of erodible particles on  
775 cultivated soils by wind tunnel simulation, *Chin. Sci. Bull.*, 43, 1646–1651,  
776 <https://doi.org/10.1007/BF02883411>, 1998.

777 Mahowald, N. M., Muhs, D. R., Levis, S., Rasch, P. J., Yoshioka, M., Zender, C. S., and Luo, C.:  
778 Change in atmospheric mineral aerosols in response to climate: Last glacial period,  
779 preindustrial, modern, and doubled carbon dioxide climates, *Journal of Geophysical  
780 Research: Atmospheres*, 111, <https://doi.org/10.1029/2005JD006653>, 2006.

781 Mailler, S., Menut, L., Khvorostyanov, D., Valari, M., Couvidat, F., Siour, G., Turquety, S.,  
782 Briant, R., Tuccella, P., Bessagnet, B., Colette, A., Létinois, L., Markakis, K., and  
783 Meleux, F.: CHIMERE-2017: from urban to hemispheric chemistry-transport modeling,  
784 Geoscientific Model Development, 10, 2397–2423, [https://doi.org/10.5194/gmd-10-](https://doi.org/10.5194/gmd-10-2397-2017)  
785 2397-2017, 2017.

786 Malobane, M. E., Nciizah, A. D., Mudau, F. N., and Wakindiki, I. I. C.: Discrimination of soil  
787 aggregates using micro-focus X-ray computed tomography in a five-year-old no-till  
788 natural fallow and conventional tillage in South Africa, *Heliyon*, 5, e01819,  
789 <https://doi.org/10.1016/j.heliyon.2019.e01819>, 2019.

790 Marticorena, B. and Bergametti, G.: Modeling the atmospheric dust cycle: 1. Design of a soil-  
791 derived dust emission scheme, *Journal of Geophysical Research: Atmospheres*, 100,  
792 16415–16430, <https://doi.org/10.1029/95JD00690>, 1995.

793 Marticorena, B., Kardous, M., Bergametti, G., Callot, Y., Chazette, P., Khatteli, H., Hégarat-  
794 Mascle, S. L., Maillé, M., Rajot, J.-L., Vidal-Madjar, D., and Zribi, M.: Surface and  
795 aerodynamic roughness in arid and semiarid areas and their relation to radar backscatter  
796 coefficient, *Journal of Geophysical Research: Earth Surface*, 111,  
797 <https://doi.org/10.1029/2006JF000462>, 2006.

798 Martin, R. L. and Kok, J. F.: Distinct Thresholds for the Initiation and Cessation of Aeolian  
799 Saltation From Field Measurements, *Journal of Geophysical Research: Earth Surface*,  
800 123, 1546–1565, <https://doi.org/10.1029/2017JF004416>, 2018.

801 Mei, F., Zhang, X., Lu, H., Shen, Z., and Wang, Y.: Characterization of MASDs of surface soils  
802 in north China and its influence on estimating dust emission, *Chin.Sci.Bull.*, 49, 2169–  
803 2176, <https://doi.org/10.1007/BF03185784>, 2004.

804 Meng, J., Martin, R. V., Ginoux, P., Hammer, M., Sulprizio, M. P., Ridley, D. A., and van  
805 Donkelaar, A.: Grid-independent high-resolution dust emissions (v1.0) for chemical  
806 transport models: application to GEOS-Chem (12.5.0), *Geoscientific Model*  
807 *Development*, 14, 4249–4260, <https://doi.org/10.5194/gmd-14-4249-2021>, 2021.

808 Menut, L.: Modeling of Mineral Dust Emissions with a Weibull Wind Speed Distribution  
809 Including Subgrid-Scale Orography Variance, *Journal of Atmospheric and Oceanic*  
810 *Technology*, 35, 1221–1236, <https://doi.org/10.1175/JTECH-D-17-0173.1>, 2018.

811 Menut, L., Pérez, C., Haustein, K., Bessagnet, B., Prigent, C., and Alfaro, S.: Impact of surface  
812 roughness and soil texture on mineral dust emission fluxes modeling, *Journal of*  
813 *Geophysical Research: Atmospheres*, 118, 6505–6520,  
814 <https://doi.org/10.1002/jgrd.50313>, 2013.

815 Menut, L., Bessagnet, B., Briant, R., Cholakian, A., Couvidat, F., Mailler, S., Pennel, R., Siour,  
816 G., Tuccella, P., Turquety, S., and Valari, M.: The CHIMERE v2020r1 online chemistry-  
817 transport model, *Geoscientific Model Development*, 14, 6781–6811,  
818 <https://doi.org/10.5194/gmd-14-6781-2021>, 2021.

819 Mirzamostafa, N., Stone, L. R., Hagen, L. J., and Skidmore, E. L.: Soil Aggregate and Texture  
820 Effects on Suspension Components from Wind Erosion, *Soil Science Society of America*  
821 *Journal*, 62, 1351–1361, <https://doi.org/10.2136/sssaj1998.03615995006200050030x>,  
822 1998.

823 Okin, G. S.: A new model of wind erosion in the presence of vegetation, *Journal of Geophysical*  
824 *Research: Earth Surface*, 113, <https://doi.org/10.1029/2007JF000758>, 2008.

825 Oleson, K., Lawrence, D., Bonan, G., Drewniack, B., Huang, M., Koven, C., Levis, S., Li, F.,  
826 Riley, W., and Subin, Z.: Technical description of version 4.5 of the Community Land

827 Model (CLM)(Technical Note No. NCAR/TN-503+ STR). Boulder, CO: National Center  
828 for Atmospheric Research Earth System Laboratory, 2013.

829 Prigent, C., Tegen, I., Aires, F., Marticorena, B., and Zribi, M.: Estimation of the aerodynamic  
830 roughness length in arid and semi-arid regions over the globe with the ERS scatterometer,  
831 *Journal of Geophysical Research: Atmospheres*, 110,  
832 <https://doi.org/10.1029/2004JD005370>, 2005.

833 Prigent, C., Jiménez, C., and Catherinot, J.: Comparison of satellite microwave backscattering  
834 (ASCAT) and visible/near-infrared reflectances (PARASOL) for the estimation of  
835 aeolian aerodynamic roughness length in arid and semi-arid regions, *Atmospheric  
836 Measurement Techniques*, 5, 2703–2712, <https://doi.org/10.5194/amt-5-2703-2012>, 2012.

837 Pu, B., Ginoux, P., Guo, H., Hsu, N. C., Kimball, J., Marticorena, B., Malyshev, S., Naik, V.,  
838 O’Neill, N. T., Pérez García-Pando, C., Paireau, J., Prospero, J. M., Shevliakova, E., and  
839 Zhao, M.: Retrieving the global distribution of the threshold of wind erosion from  
840 satellite data and implementing it into the Geophysical Fluid Dynamics Laboratory land–  
841 atmosphere model (GFDL AM4.0/LM4.0), *Atmos. Chem. Phys.*, 20, 55–81,  
842 <https://doi.org/10.5194/acp-20-55-2020>, 2020.

843 Rastigejev, Y., Park, R., Brenner, M. P., and Jacob, D. J.: Resolving intercontinental pollution  
844 plumes in global models of atmospheric transport, *Journal of Geophysical Research:  
845 Atmospheres*, 115, <https://doi.org/10.1029/2009JD012568>, 2010.

846 Raupach, M. R., Gillette, D. A., and Leys, J. F.: The effect of roughness elements on wind  
847 erosion threshold, *Journal of Geophysical Research: Atmospheres*, 98, 3023–3029,  
848 <https://doi.org/10.1029/92JD01922>, 1993.

849 Ridley, D. A., Heald, C. L., Pierce, J. R., and Evans, M. J.: Toward resolution-independent dust  
850 emissions in global models: Impacts on the seasonal and spatial distribution of dust,  
851 *Geophysical Research Letters*, 40, 2873–2877, <https://doi.org/10.1002/grl.50409>, 2013.

852 Semakin, A. N. and Rastigejev, Y.: Numerical Simulation of Global-Scale Atmospheric  
853 Chemical Transport with High-Order Wavelet-Based Adaptive Mesh Refinement  
854 Algorithm, *Monthly Weather Review*, 144, 1469–1486, <https://doi.org/10.1175/MWR-D-15-0200.1>, 2016.

856 Shao, Y., Raupach, M. R., and Findlater, P. A.: Effect of saltation bombardment on the  
857 entrainment of dust by wind, *Journal of Geophysical Research: Atmospheres*, 98, 12719–  
858 12726, <https://doi.org/10.1029/93JD00396>, 1993.

859 Shao, Y., Ishizuka, M., Mikami, M., and Leys, J. F.: Parameterization of size-resolved dust  
860 emission and validation with measurements, *Journal of Geophysical Research:  
861 Atmospheres*, 116, <https://doi.org/10.1029/2010JD014527>, 2011.

862 Shirazi, M. A. and Boersma, L.: A Unifying Quantitative Analysis of Soil Texture, *Soil Science  
863 Society of America Journal*, 48, 142–147,  
864 <https://doi.org/10.2136/sssaj1984.03615995004800010026x>, 1984.

865 Stull, R.: *An Introduction to Boundary Layer Meteorology*, 1988.

866 Su, Y., Wang, F., Zhang, Z., and Du, M.: Soil Properties and Characteristics of Soil Aggregate in  
867 Marginal Farmlands of Oasis in the Middle of Hexi Corridor Region, Northwest China,  
868 *Agricultural Sciences in China*, 6, 706–714, [https://doi.org/10.1016/S1671-2927\(07\)60103-5](https://doi.org/10.1016/S1671-2927(07)60103-5), 2007.

870 Swet, N. and Kutra, I.: Reduction in soil aggregation in response to dust emission processes,  
871 *Geomorphology*, 268, 177–183, <https://doi.org/10.1016/j.geomorph.2016.06.002>, 2016.

872 Tai, A. P. K., Ma, P. H. L., Chan, Y.-C., Chow, M.-K., Ridley, D. A., and Kok, J. F.: Impacts of  
873 climate and land cover variability and trends on springtime East Asian dust emission over  
874 1982–2010: A modeling study, *Atmospheric Environment*, 254, 118348,  
875 <https://doi.org/10.1016/j.atmosenv.2021.118348>, 2021.

876 Tegen, I., Harrison, S. P., Kohfeld, K., Prentice, I. C., Coe, M., and Heimann, M.: Impact of  
877 vegetation and preferential source areas on global dust aerosol: Results from a model  
878 study, *Journal of Geophysical Research: Atmospheres*, 107, AAC 14-1-AAC 14-27,  
879 <https://doi.org/10.1029/2001JD000963>, 2002.

880 Udom, B. E. and Ogunwole, J. O.: Soil organic carbon, nitrogen, and phosphorus distribution in  
881 stable aggregates of an Ultisol under contrasting land use and management history,  
882 *Journal of Plant Nutrition and Soil Science*, 178, 460–467,  
883 <https://doi.org/10.1002/jpln.201400535>, 2015.

884 Wagner, L. E., Ambe, N. M., and Barnes, P.: Tillage-Induced Soil Aggregate Status as  
885 Influenced by Water Content, *Transactions of the ASAE*, 35, 499–504,  
886 <https://doi.org/10.13031/2013.28627>, 1992.

887 Zender, C. S., Bian, H., and Newman, D.: Mineral Dust Entrainment and Deposition (DEAD)  
888 model: Description and 1990s dust climatology, *Journal of Geophysical Research:*  
889 *Atmospheres*, 108, <https://doi.org/10.1029/2002JD002775>, 2003a.

890 Zender, C. S., Newman, D., and Torres, O.: Spatial heterogeneity in aeolian erodibility: Uniform,  
891 topographic, geomorphic, and hydrologic hypotheses, *Journal of Geophysical Research:*  
892 *Atmospheres*, 108, <https://doi.org/10.1029/2002JD003039>, 2003b.

893 Zhang, K., Zhao, C., Wan, H., Qian, Y., Easter, R. C., Ghan, S. J., Sakaguchi, K., and Liu, X.:  
894 Quantifying the impact of sub-grid surface wind variability on sea salt and dust emissions  
895 in CAM5, *Geoscientific Model Development*, 9, 607–632, [https://doi.org/10.5194/gmd-](https://doi.org/10.5194/gmd-9-607-2016)  
896 [9-607-2016](https://doi.org/10.5194/gmd-9-607-2016), 2016.

897 Zhang, L., Kok, J. F., Henze, D. K., Li, Q., and Zhao, C.: Improving simulations of fine dust  
898 surface concentrations over the western United States by optimizing the particle size  
899 distribution, *Geophysical Research Letters*, 40, 3270–3275,  
900 <https://doi.org/10.1002/grl.50591>, 2013.

901 Zhuang, J., Jacob, D. J., and Eastham, S. D.: The importance of vertical resolution in the free  
902 troposphere for modeling intercontinental plumes, *Atmospheric Chemistry and Physics*,  
903 18, 6039–6055, <https://doi.org/10.5194/acp-18-6039-2018>, 2018.

904 Zhuang, J., Kochkov, D., Bar-Sinai, Y., Brenner, M. P., and Hoyer, S.: Learned discretizations  
905 for passive scalar advection in a two-dimensional turbulent flow, *Phys. Rev. Fluids*, 6,  
906 064605, <https://doi.org/10.1103/PhysRevFluids.6.064605>, 2021.

907
